# Supplementary material for: K2S2O8-promoted rearrangement of nitrones for the synthesis of benzo[d]oxazoles
Source: Royal Society of Chemistry journal article supplement (doi:10.1039/d2qo00680d), 2022-01-01

## Supporting Information

### K<sub>2</sub>S<sub>2</sub>O<sub>8</sub>-Prompted Rearrangement of Nitrones for the Synthesis of Benzo[d]oxazoles

Xueying Yang,<sup>a</sup> Xin Guo<sup>b</sup>, Xinglong Yuan,<sup>a</sup> and Baohua Chen <sup>\*a</sup>

<sup>a</sup>State Key Laboratory of Applied Organic Chemistry, Key laboratory of Nonferrous Metal Chemistry and Resources Utilization of Gansu Province, Department of Chemistry, Lanzhou University, Lanzhou, Gansu, China.

Fax: (+86)-931-891-2582; e-mail: chbh@lzu.edu.cn

<sup>b</sup>School of Chemistry and Chemical Engineering, North Minzu University, Yinchuan, China

### Contents

|                                                                  |         |
|------------------------------------------------------------------|---------|
| 1. General information-----                                      | 2       |
| 2. Characterization data for isolated compounds-----             | 2 - 9   |
| 3. References-----                                               | 9-10    |
| 4. Copies of <sup>1</sup> H and <sup>13</sup> C NMR spectra----- | 10 - 29 |

## 1. General information

$^1\text{H}$  NMR and  $^{13}\text{C}$  NMR spectra were recorded on 300MHz and 75MHz in  $\text{CDCl}_3$  ( $^1\text{H}$  NMR and  $^{13}\text{C}$  NMR spectra of 2bl and 2ak were recorded on 400MHz and 101MHz in  $\text{CDCl}_3$ ). All chemical shifts are given as  $\delta$  value (ppm) with reference to tetramethylsilane (TMS) as an internal standard. Products were purified by flash chromatography on 200-300 mesh silica gel. Unless otherwise noted, commercially reagents were used without further purification.

General procedure for the synthesis of 2 (2aa as an example)

Synthesis of 2aa: A test tube was charged with nitrone (0.2 mmol),  $\text{K}_2\text{S}_2\text{O}_8$  (0.6 mmol) in DCE (2 mL). The mixture was stirred at  $120^\circ\text{C}$  for 12 h. When the reaction was completed, the mixture was concentrated under reduced pressure. The residue was purified by column chromatography on silica gel (petroleum ether/EtOAc = 30:1) to yield the isolated product 2aa.

## 2. Characterization data for isolated compounds

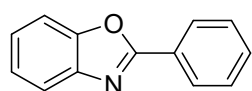

**2-phenylbenzo[d]oxazole 2aa.**<sup>1,2</sup> White solid (33.5 mg 86%);  $^1\text{H}$  NMR (300 MHz,  $\text{CDCl}_3$ )  $\delta$  8.32 – 8.23 (m, 2H), 7.83 – 7.76 (m, 1H), 7.64 – 7.57 (m, 1H), 7.57 – 7.51 (m, 3H), 7.41 – 7.33 (m, 2H).  $^{13}\text{C}$  NMR (75 MHz,  $\text{CDCl}_3$ )  $\delta$  163.00 (s), 150.72 (s), 142.06 (s), 131.48 (s),

128.87 (s), 127.58 (s), 127.13 (s), 125.07 (s), 124.54 (s), 119.98 (s), 110.56 (s).

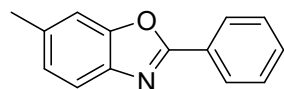

**6-methyl-2-phenylbenzo[d]oxazole 2ab.**<sup>3</sup> White solid (33.4 mg 80%); <sup>1</sup>H NMR (300 MHz, CDCl<sub>3</sub>) δ 8.16 – 8.08 (m, 2H), 7.53 (d, J = 8.1 Hz, 1H), 7.40 (dd, J = 6.6, 3.6 Hz, 3H), 7.25 (s, 1H), 7.05 (d, J = 8.1 Hz, 1H), 2.38 (s, 3H). <sup>13</sup>C NMR (75 MHz, CDCl<sub>3</sub>) δ 162.48 (s), 150.98 (s), 139.86 (s), 135.47 (s), 131.18 (s), 128.78 (s), 127.38 (s), 125.73 (s), 119.27 (s), 110.68 (s), 77.42 (s), 77.00 (s), 76.58 (s), 21.73 (s).

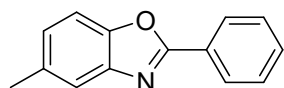

**5-methyl-2-phenylbenzo[d]oxazole 2ac.**<sup>3</sup> White solid (34.8 mg 83%); <sup>1</sup>H NMR (300 MHz, CDCl<sub>3</sub>) δ 8.24 (dd, J = 6.8, 3.0 Hz, 2H), 7.55 (s, 1H), 7.53 – 7.48 (m, 3H), 7.45 (d, J = 8.3 Hz, 1H), 7.19 – 7.11 (m, 1H), 2.48 (s, 3H). <sup>13</sup>C NMR (75 MHz, CDCl<sub>3</sub>) δ 163.01 (s), 148.86 (s), 142.15 (s), 134.32 (s), 131.33 (s), 128.82 (s), 127.45 (s), 127.18 (s), 126.17 (s), 119.81 (s), 109.89 (s), 77.42 (s), 77.00 (s), 76.58 (s), 21.52 (s).

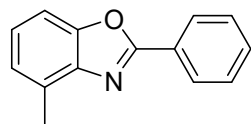

**4-methyl-2-phenylbenzo[d]oxazole 2ad.**<sup>5</sup> White solid (11.3 mg 27%); <sup>1</sup>H NMR (300 MHz, CDCl<sub>3</sub>) δ 8.30 – 8.23 (m, 2H), 7.54 – 7.47 (m, 3H), 7.39 (d, J = 8.0 Hz, 1H), 7.24 (t, J = 3.8 Hz, 1H), 7.14 (d, J = 7.4 Hz, 1H), 2.68 (s, 3H). <sup>13</sup>C NMR (75 MHz, CDCl<sub>3</sub>) δ 162.26 (s), 150.53 (s), 141.43 (s), 131.23 (s), 130.59 (s), 128.80 (s), 127.58 (s),

127.45 (s), 125.02 (s), 124.71 (s), 107.81 (s), 16.55 (s).

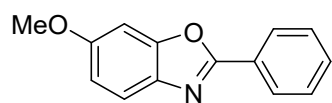

**6-methoxy-2-phenylbenzo[d]oxazole 2ae.**<sup>6</sup> White solid (26.7 mg 59%); <sup>1</sup>H NMR (300 MHz, CDCl<sub>3</sub>) δ 8.25 – 8.14 (m, 2H), 7.64 (d, J = 8.7 Hz, 1H), 7.56 – 7.45 (m, 3H), 7.11 (d, J = 2.3 Hz, 1H), 6.96 (dd, J = 8.7, 2.4 Hz, 1H), 3.88 (s, 3H). <sup>13</sup>C NMR (75 MHz, CDCl<sub>3</sub>) δ 158.24 (s), 151.60 (s), 135.83 (s), 131.04 (s), 128.84 (s), 127.31 (s), 127.15 (s), 119.95 (s), 112.79 (s), 95.39 (s), 77.42 (s), 77.00 (s), 76.58 (s), 55.92 (s).

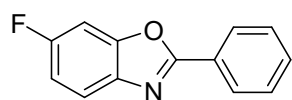

**6-fluoro-2-phenylbenzo[d]oxazole 2af.**<sup>3</sup> White solid (34.3 mg 82%); <sup>1</sup>H NMR (300 MHz, CDCl<sub>3</sub>) δ 8.15 – 8.09 (m, 2H), 7.60 (dd, J = 8.7, 4.9 Hz, 1H), 7.47 – 7.39 (m, 3H), 7.23 – 7.16 (m, 1H), 7.05 – 6.97 (m, 1H). <sup>13</sup>C NMR (75 MHz, CDCl<sub>3</sub>) δ 162.27 (s), 159.04 (s), 150.69 (d, J = 14.4 Hz), 138.42 (s), 131.56 (s), 128.92 (s), 127.46 (s), 126.88 (s), 120.22 (d, J = 10.1 Hz), 112.67 (s), 112.34 (s), 98.82 (s), 98.45 (s), 77.42 (s), 77.00 (s), 76.58 (s).

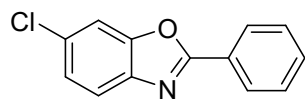

**6-chloro-2-phenylbenzo[d]oxazole 2ag.**<sup>3</sup> White solid (41.7 mg 91%); <sup>1</sup>H NMR (300 MHz, CDCl<sub>3</sub>) δ 8.27 – 8.14 (m, 2H), 7.65 (d, J = 8.5 Hz, 1H), 7.56 (d, J = 1.7 Hz, 1H), 7.54 – 7.44 (m, 3H), 7.35 – 7.27 (m, 1H). <sup>13</sup>C NMR (75 MHz, CDCl<sub>3</sub>) δ 163.64 (s), 150.87 (s), 140.85 (s), 131.74 (s), 130.63 (s), 128.91 (s), 127.61 (s), 126.66 (s), 125.23 (s), 120.42 (s), 111.18 (s).

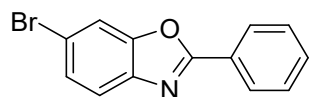

**6-bromo-2-phenylbenzo[d]oxazole 2ah.**<sup>4</sup> White

solid (45.3 mg 83%); <sup>1</sup>H NMR (300 MHz, CDCl<sub>3</sub>) δ 8.23 (ddd, J = 5.5, 3.1, 1.5 Hz, 2H), 7.76 – 7.71 (m, 1H), 7.62 (d, J = 8.5 Hz, 1H), 7.57 – 7.49 (m, 3H), 7.49 – 7.44 (m, 1H). <sup>13</sup>C NMR (75 MHz, CDCl<sub>3</sub>) δ 163.49 (s), 151.17 (s), 141.29 (s), 131.79 (s), 128.93 (s), 127.98 (s), 127.65 (s), 126.62 (s), 120.90 (s), 117.92 (s), 114.07 (s), 77.42 (s), 77.00 (s), 76.58 (s).

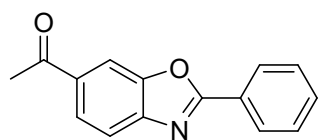

**1-(2-phenylbenzo[d]oxazol-6-yl)ethan-1-one 2ak.**

White solid (22.3 mg 47%); <sup>1</sup>H NMR (400 MHz, CDCl<sub>3</sub>) δ 8.29 – 8.26 (m, 2H), 8.20 (d, J = 1.1 Hz, 1H), 8.03 – 7.99 (m, 1H), 7.84 – 7.78 (m, 1H), 2.69 (s, 3H). <sup>13</sup>C NMR (101 MHz, CDCl<sub>3</sub>) δ 196.94 (s), 165.88 (s), 150.77 (s), 146.14 (s), 134.38 (s), 132.31 (s), 129.08 (s), 128.02 (s), 126.56 (s), 125.52 (s), 119.69 (s), 110.81 (s), 26.91 (s).

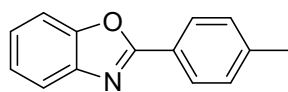

**2-(p-tolyl)benzo[d]oxazole 2ba.**<sup>1</sup> White solid (27.2

mg 65%); <sup>1</sup>H NMR (300 MHz, CDCl<sub>3</sub>) δ 8.14 (d, J = 8.0 Hz, 2H), 7.78 – 7.71 (m, 1H), 7.59 – 7.53 (m, 1H), 7.32 (dd, J = 8.5, 3.8 Hz, 4H), 2.42 (s, 3H). <sup>13</sup>C NMR (75 MHz, CDCl<sub>3</sub>) δ 163.25 (s), 150.65 (s), 142.15 (s), 141.99 (s), 129.59 (s), 127.55 (s), 125.49 (s), 124.81 (s), 124.42 (s), 122.31 (s), 119.80 (s), 110.44 (s), 77.42 (s), 77.00 (s), 76.58 (s), 21.59 (s).

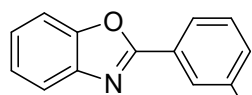

**2-(m-tolyl)benzo[d]oxazole 2bb.**<sup>4</sup> White solid (23.4 mg 56%); <sup>1</sup>H NMR (300 MHz, CDCl<sub>3</sub>) δ 8.05 (d, J = 7.6 Hz, 1H), 7.81 – 7.74 (m, 1H), 7.61 – 7.54 (m, 1H), 7.40 (d, J = 7.6 Hz, 1H), 7.35 (dd, J = 5.7, 3.5 Hz, 3H), 2.45 (s, 3H). <sup>13</sup>C NMR (75 MHz, CDCl<sub>3</sub>) δ 150.59 (s), 141.94 (s), 138.67 (s), 132.32 (s), 128.76 (s), 128.09 (s), 126.84 (s), 124.98 (s), 124.64 (s), 124.48 (s), 119.85 (s), 110.51 (s), 77.42 (s), 77.00 (s), 76.58 (s), 21.32 (s).

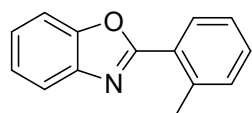

**2-(o-tolyl)benzo[d]oxazole 2bc.**<sup>1</sup> White solid (10.1 mg 56%); <sup>1</sup>H NMR (300 MHz, CDCl<sub>3</sub>) δ 8.20 (dd, J = 6.5, 3.0 Hz, 1H), 7.86 – 7.79 (m, 1H), 7.64 – 7.57 (m, 1H), 7.46 – 7.32 (m, 5H), 2.84 (s, 3H). <sup>13</sup>C NMR (75 MHz, CDCl<sub>3</sub>) δ 163.38 (s), 150.28 (s), 142.10 (s), 138.82 (s), 131.75 (s), 130.86 (s), 129.92 (s), 126.22 (s), 126.02 (s), 124.97 (s), 124.33 (s), 120.11 (s), 110.45 (s), 77.42 (s), 77.00 (s), 76.58 (s), 22.17 (s).

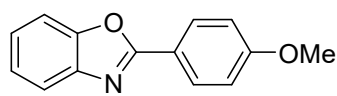

**2-(4-methoxyphenyl)benzo[d]oxazole 2bd.**<sup>3</sup> White solid (21.5 mg 51%); <sup>1</sup>H NMR (300 MHz, CDCl<sub>3</sub>) δ 8.20 (dd, J = 9.0, 2.1 Hz, 2H), 7.78 – 7.69 (m, 1H), 7.60 – 7.51 (m, 1H), 7.38 – 7.27 (m, 2H), 7.03 (dd, J = 8.9, 2.0 Hz, 2H), 3.89 (d, J = 2.0 Hz, 3H). <sup>13</sup>C NMR (75 MHz, CDCl<sub>3</sub>) δ 163.08 (s), 162.20 (s), 150.50 (s), 142.04 (s), 129.30 (s), 124.55 (s), 124.37 (s), 119.49 (s), 114.25 (s), 110.32 (s), 77.42 (s), 77.00 (s), 76.58 (s), 55.37 (s).

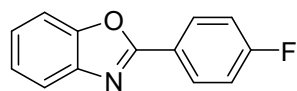

**2-(4-fluorophenyl)benzo[d]oxazole 2be.**<sup>2</sup> White

solid (36.6 mg 88%); <sup>1</sup>H NMR (300 MHz, CDCl<sub>3</sub>) δ 8.29 – 8.20 (m, 2H), 7.80 – 7.71 (m, 1H), 7.59 – 7.52 (m, 1H), 7.38 – 7.30 (m, 2H), 7.24 – 7.15 (m, 2H). <sup>13</sup>C NMR (75 MHz, CDCl<sub>3</sub>) δ 166.44 (s), 163.09 (s), 162.11 (s), 150.73 (s), 142.03 (s), 129.79 (d, J = 8.9 Hz), 125.09 (s), 124.62 (s), 123.45 (s), 119.95 (s), 116.28 (s), 115.99 (s), 110.52 (s), 77.42 (s), 77.00 (s), 76.58 (s).

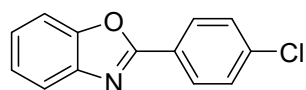

**2-(4-chlorophenyl)benzo[d]oxazole 2bf.**<sup>1</sup> White

solid (43.5 mg 95%); <sup>1</sup>H NMR (300 MHz, CDCl<sub>3</sub>) δ 8.20 – 8.11 (m, 2H), 7.79 – 7.71 (m, 1H), 7.59 – 7.51 (m, 1H), 7.50 – 7.43 (m, 2H), 7.34 (dd, J = 6.0, 3.2 Hz, 2H). <sup>13</sup>C NMR (75 MHz, CDCl<sub>3</sub>) δ 161.98 (s), 150.70 (s), 141.97 (s), 137.69 (s), 129.19 (s), 128.78 (s), 125.61 (s), 125.28 (s), 124.67 (s), 120.04 (s), 110.56 (s).

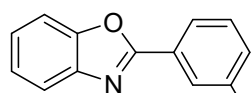

**2-(3-chlorophenyl)benzo[d]oxazole 2bg.**<sup>8</sup> White solid

(39.4 mg 86%); <sup>1</sup>H NMR (300 MHz, CDCl<sub>3</sub>) δ 8.25 (t, J = 1.6 Hz, 1H), 8.13 (d, J = 7.3 Hz, 1H), 7.82 – 7.75 (m, 1H), 7.60 – 7.56 (m, 1H), 7.50 – 7.44 (m, 2H), 7.39 – 7.35 (m, 2H). <sup>13</sup>C NMR (75 MHz, CDCl<sub>3</sub>) δ 161.49 (s), 150.66 (s), 134.96 (s), 131.35 (s), 130.11 (s), 128.74 (s), 127.49 (s), 125.52 (s), 125.43 (s), 124.71 (s), 120.13 (s), 110.60 (s).

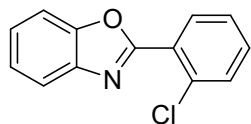

**2-(2-chlorophenyl)benzo[d]oxazole 2bh.**<sup>8</sup> White solid

(16.5 mg 36%); <sup>1</sup>H NMR (300 MHz, CDCl<sub>3</sub>) δ 8.20 – 8.13 (m, 1H), 7.91 – 7.82 (m, 1H), 7.67 – 7.54 (m, 2H), 7.50 – 7.36 (m, 4H). <sup>13</sup>C NMR (75 MHz, CDCl<sub>3</sub>) δ 150.55 (s), 141.66 (s), 133.46 (s), 131.87 (s), 131.79 (s), 131.35 (s), 126.89 (s), 126.24 (s), 125.54 (s), 124.62 (s), 120.48 (s), 110.71 (s).

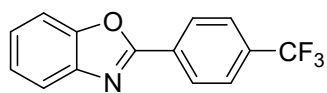

**2-(4-(trifluoromethyl)phenyl)benzo[d]oxazole**

**2bi.**<sup>3</sup> White solid (43.7 mg 83%); <sup>1</sup>H NMR (300 MHz, CDCl<sub>3</sub>) δ 8.40 – 8.33 (m, 2H), 7.83 – 7.75 (m, 3H), 7.64 – 7.57 (m, 1H), 7.43 – 7.36 (m, 2H). <sup>13</sup>C NMR (75 MHz, CDCl<sub>3</sub>) δ 161.44 (s), 150.85 (s), 141.90 (s), 133.18 (s), 132.74 (s), 130.43 (s), 127.82 (s), 125.87 (dd, J = 8.6, 4.8 Hz), 124.91 (s), 120.39 (s), 110.76 (s).

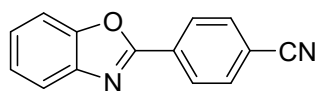

**4-(benzo[d]oxazol-2-yl)benzonitrile 2bj.**<sup>2</sup> White

solid (39.2 mg 89%); <sup>1</sup>H NMR (300 MHz, CDCl<sub>3</sub>) δ 8.33 (dd, J = 8.2, 0.6 Hz, 2H), 7.83 – 7.75 (m, 3H), 7.60 (ddd, J = 4.6, 2.3, 0.7 Hz, 1H), 7.45 – 7.36 (m, 2H). <sup>13</sup>C NMR (75 MHz, CDCl<sub>3</sub>) δ 160.82 (s), 150.81 (s), 141.79 (s), 132.59 (s), 131.02 (s), 127.87 (s), 126.10 (s), 125.06 (s), 120.50 (s), 118.08 (s), 114.66 (s), 110.80 (s).

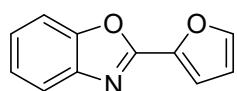

**2-(furan-2-yl)benzo[d]oxazole 2bk.**<sup>7</sup> White solid (10.1

mg 27%); <sup>1</sup>H NMR (300 MHz, CDCl<sub>3</sub>) δ 7.80 – 7.72 (m, 1H), 7.70 – 7.65



(m, 1H), 7.60 – 7.52 (m, 1H), 7.40 – 7.31 (m, 2H), 7.28 (dd, J = 3.5, 0.6 Hz, 1H), 6.62 (dd, J = 3.5, 1.8 Hz, 1H). <sup>13</sup>C NMR (75 MHz, CDCl<sub>3</sub>) δ 150.09 (s), 145.68 (s), 142.57 (s), 141.59 (s), 125.23 (s), 124.80 (s), 120.09 (s), 114.22 (s), 112.21 (s), 110.51 (s).

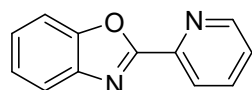

**2bl**                      **2-(pyridin-2-yl)benzo[d]oxazole 2bl.**<sup>9</sup> White solid (14.9

mg 38%); <sup>1</sup>H NMR (400 MHz, CDCl<sub>3</sub>) δ 8.82 (d, J = 4.4 Hz, 1H), 8.37 (d, J = 7.9 Hz, 1H), 7.93 – 7.80 (m, 2H), 7.72 – 7.64 (m, 1H), 7.49 – 7.36 (m, 3H). <sup>13</sup>C NMR (101 MHz, CDCl<sub>3</sub>) δ 161.43 (s), 151.03 (s), 150.28 (s), 146.04 (s), 141.74 (s), 137.09 (s), 126.03 (s), 125.57 (s), 124.92 (s), 123.43 (s), 120.62 (s), 111.22 (s).

1. Alla, S. K.; Sadhu, P.; Punniyamurthy, T., *J. Org. Chem.* **2014**, *79*, 7502.
2. Boissarie, P. J.; Hamilton, Z. E.; Lang, S.; Murphy, J. A.; Suckling, C. J., *Org. Lett.* **2011**, *13*, 6256.
3. Fink, E., *Gesundheitswesen* **2015**, *77*, 880.
4. Ranjit, S.; Liu, X., *Chemistry* **2011**, *17*, 1105.
5. Tang, L.; Guo, X.; Yang, Y.; Zha, Z.; Wang, Z., *Chem. Commun.* **2014**, *50*, 6145.
6. Yu, C.; Guo, X.; Xi, Z.; Muzzio, M.; Yin, Z.; Shen, B.; Li, J.; Seto, C. T.; Sun, S., *J. Am. Chem. Soc.* **2017**, *139*, 5712.
7. Gao, F.; Kim, B. S.; Walsh, P. J., *Chem. Commun.* **2014**, *50*, 10661.

8. Ackermann, L., *Accounts of chemical research* **2014**, *47*, 281.

9. F. Zhu, J. L. Tao and Z. X. Wang, *Org Lett*, **2015**, *17*, 4926.

### 3. Copies of $^1\text{H}$ and $^{13}\text{C}$ NMR spectra

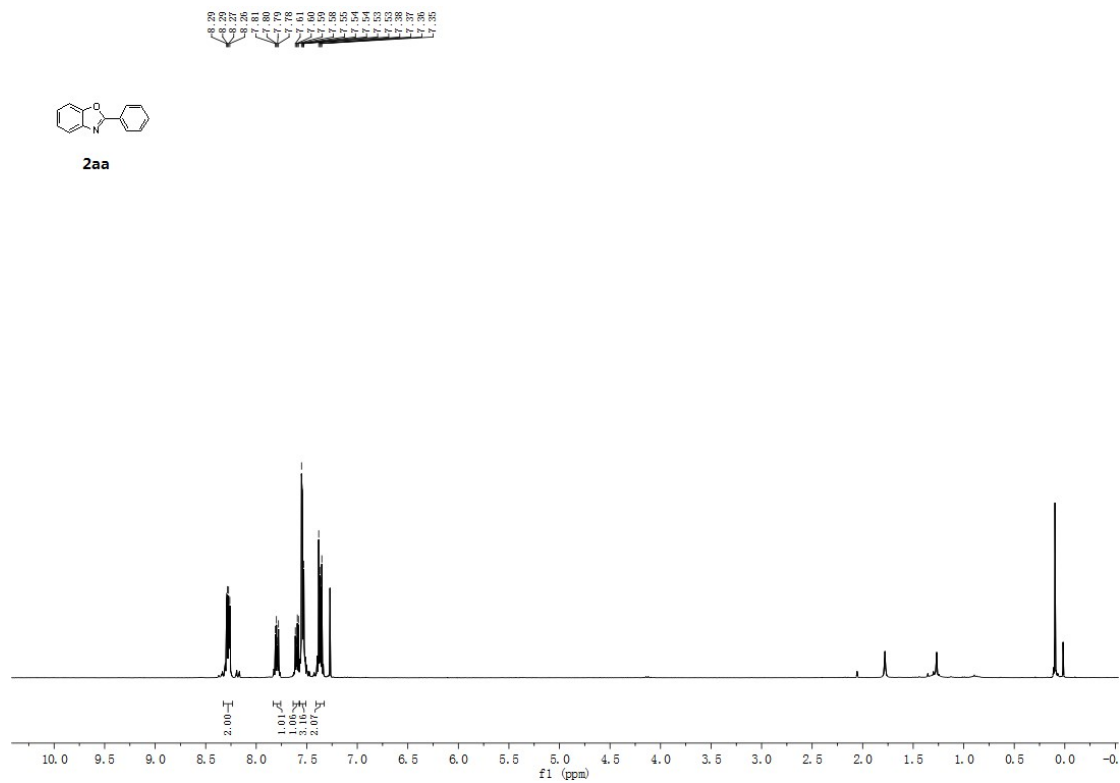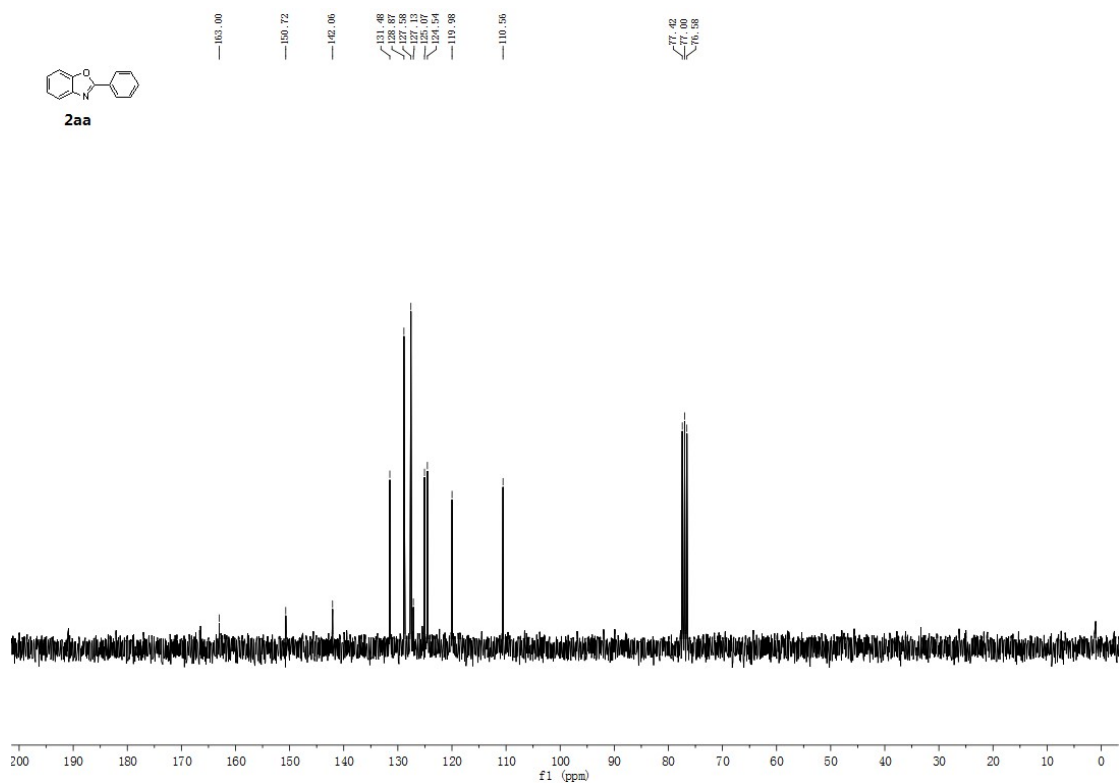

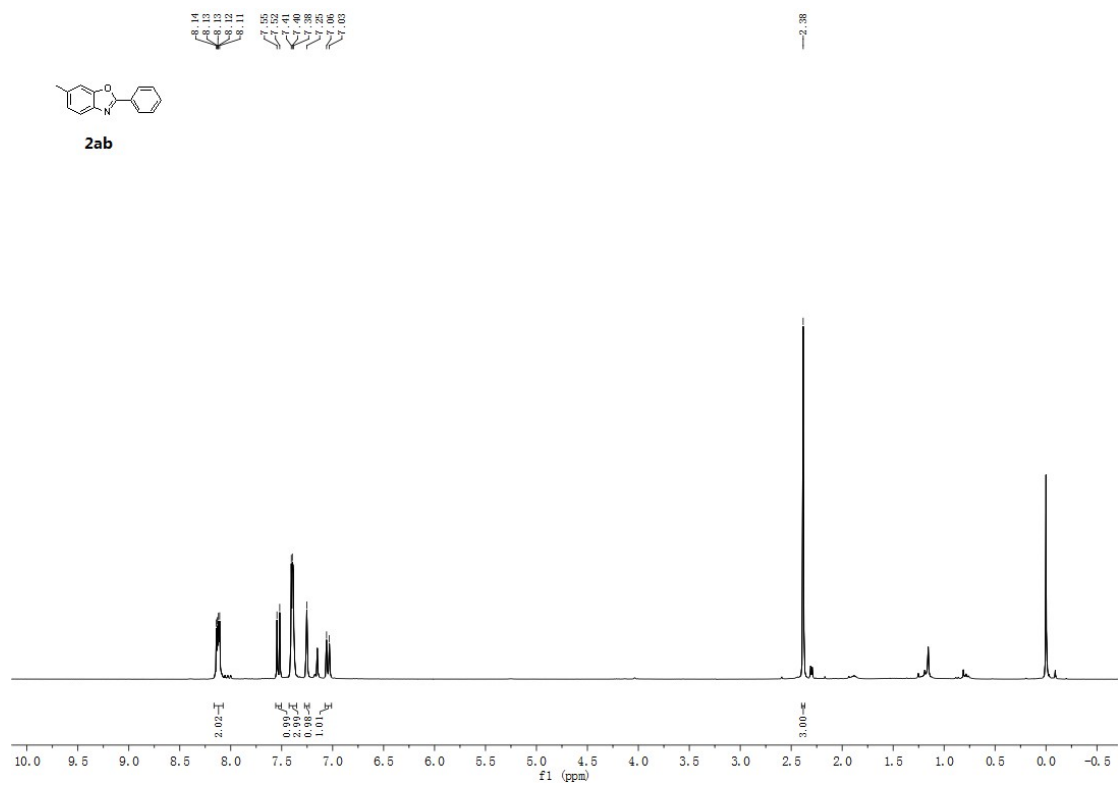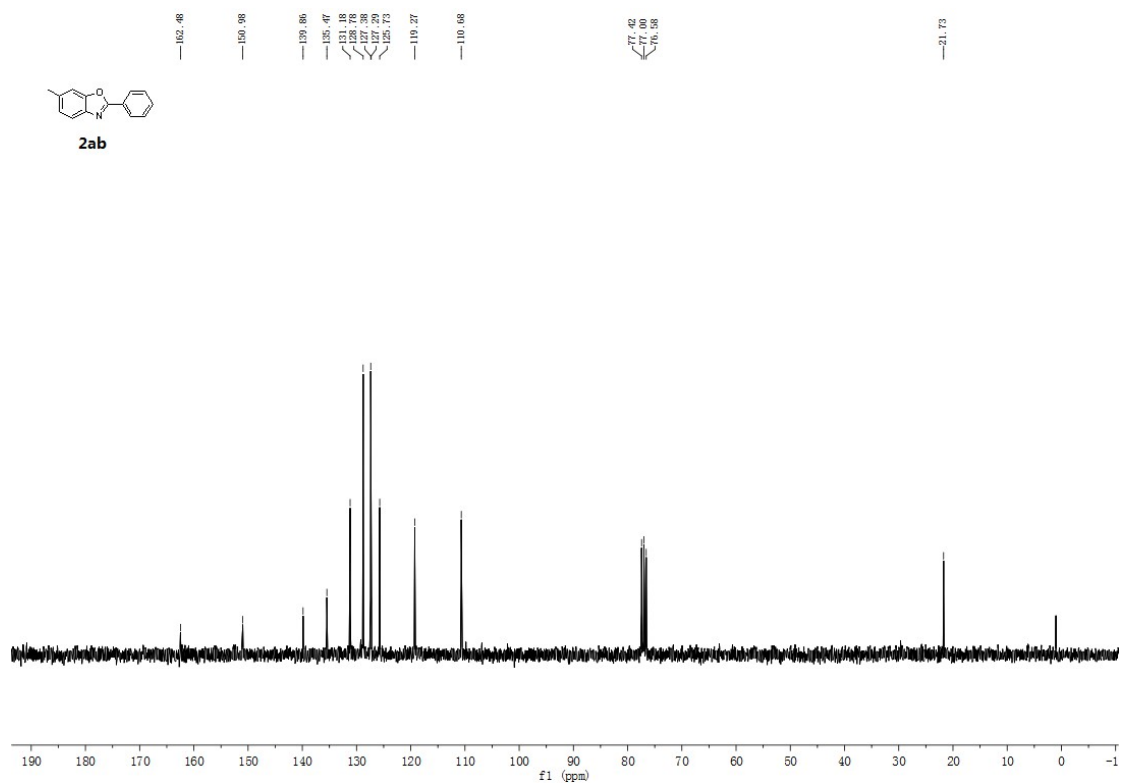

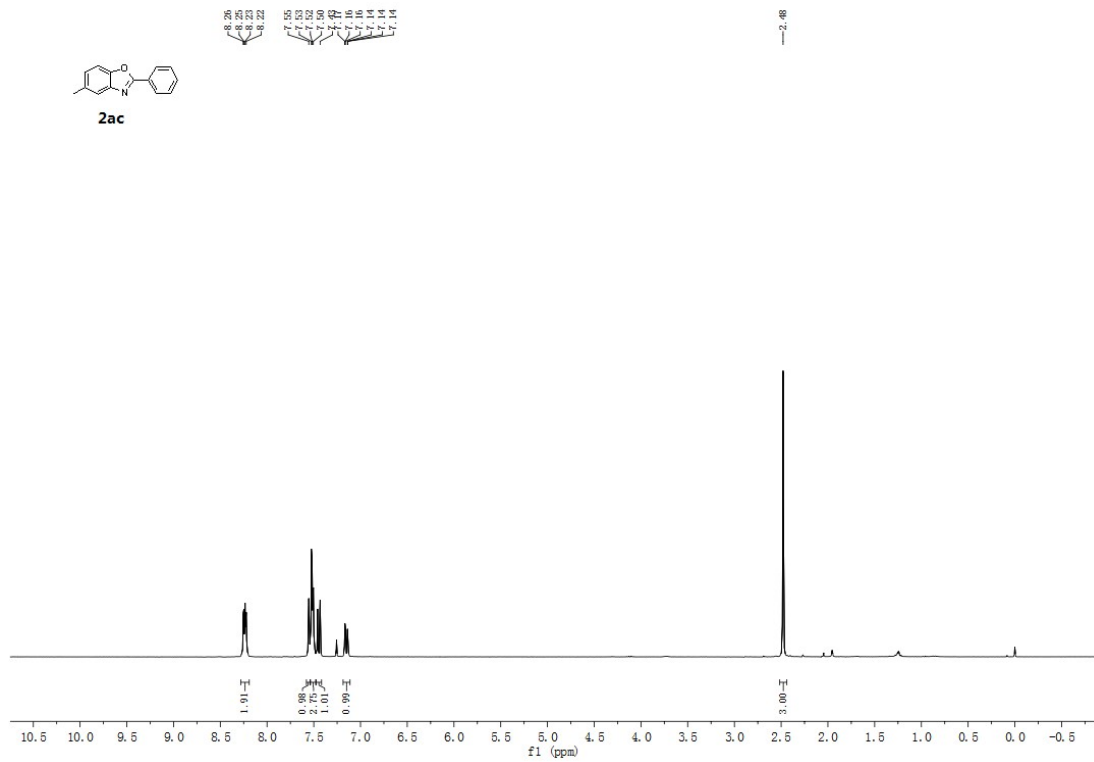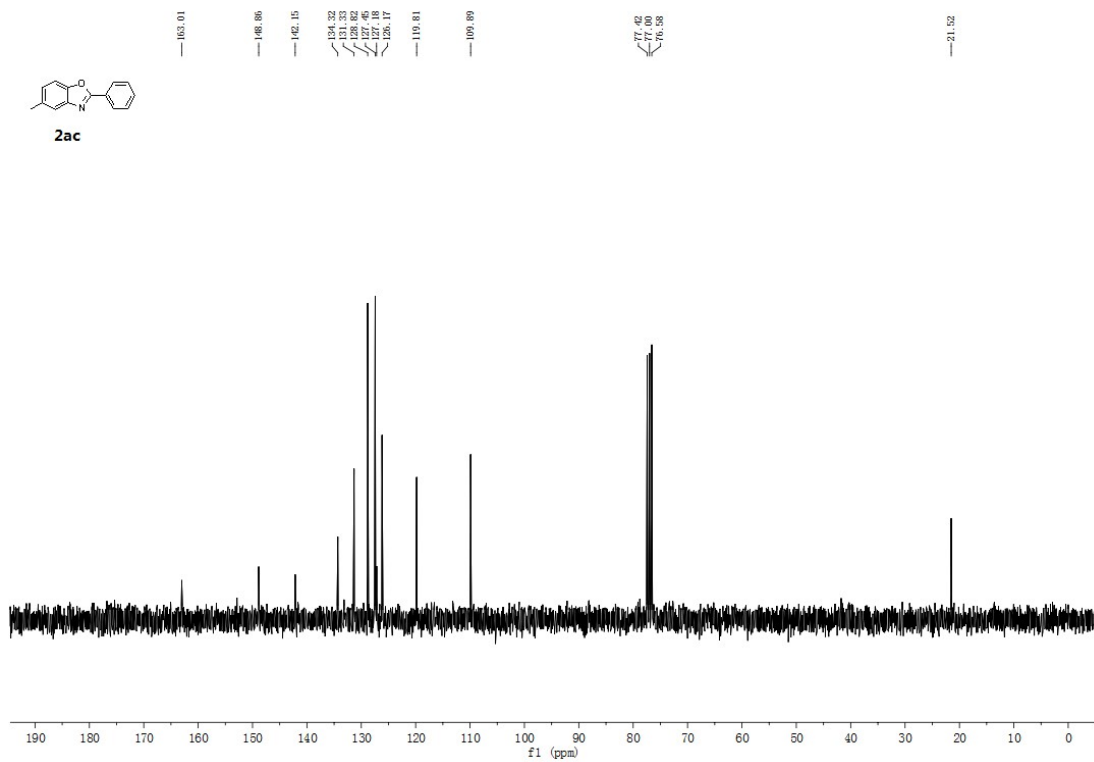

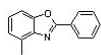

2ad

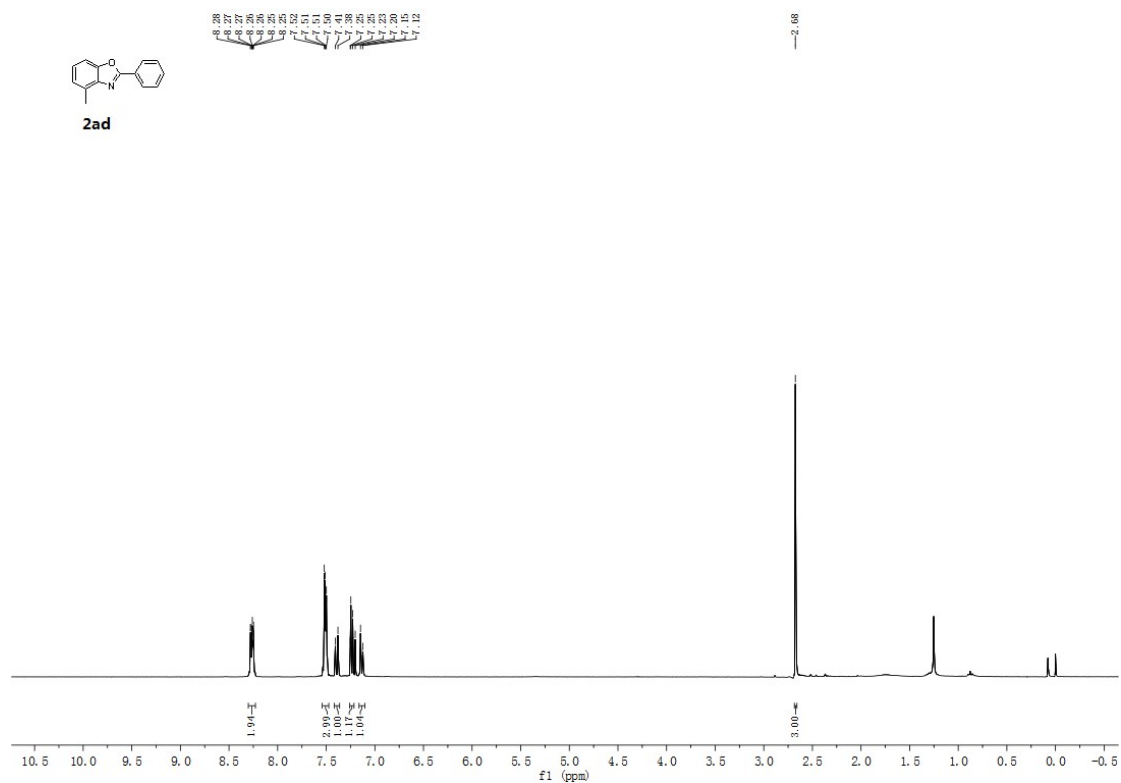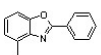

2ad

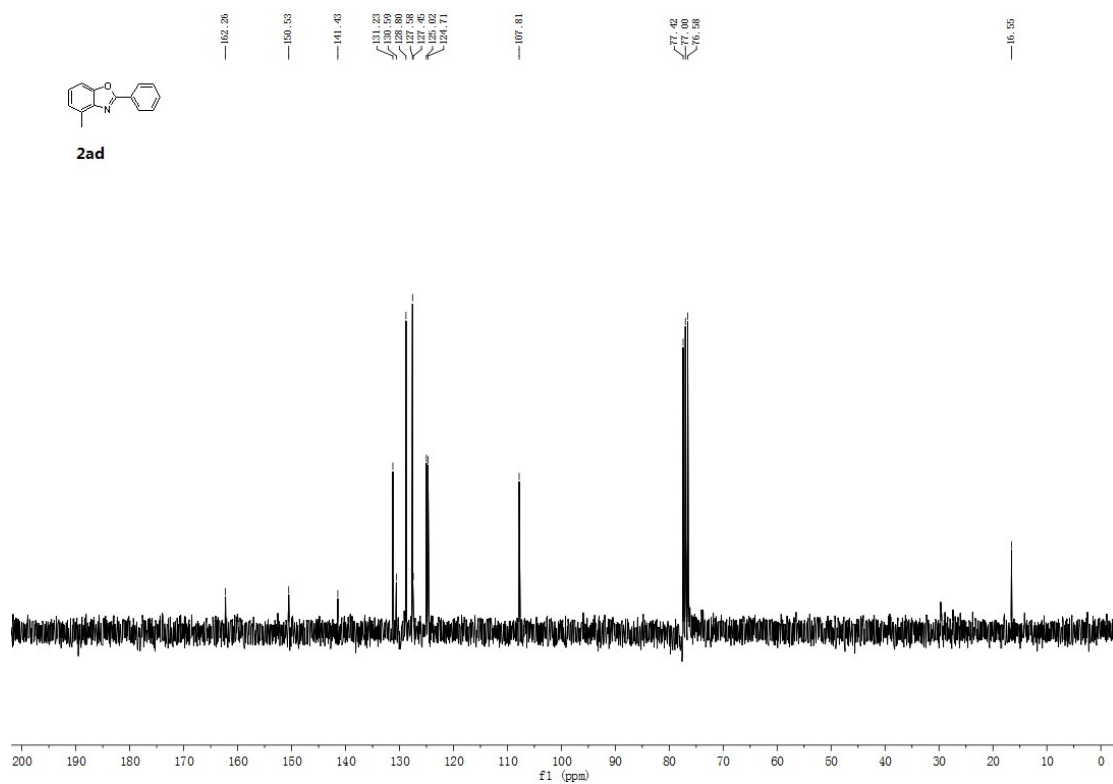

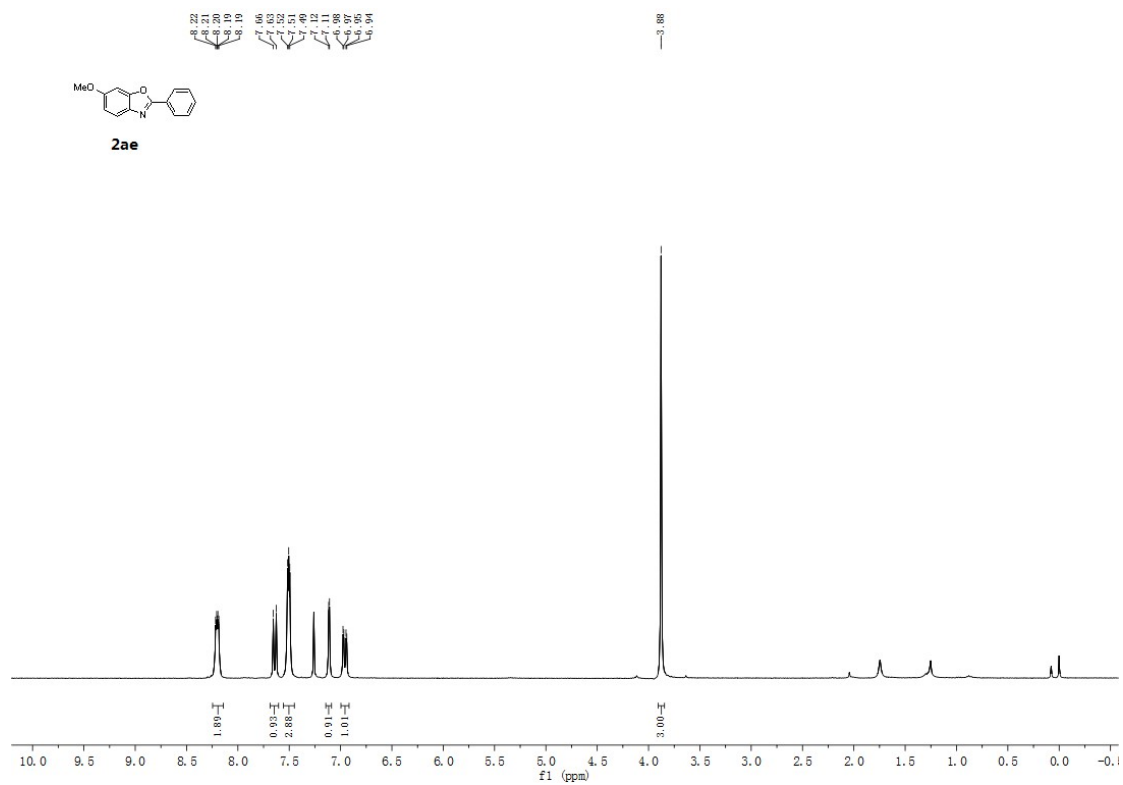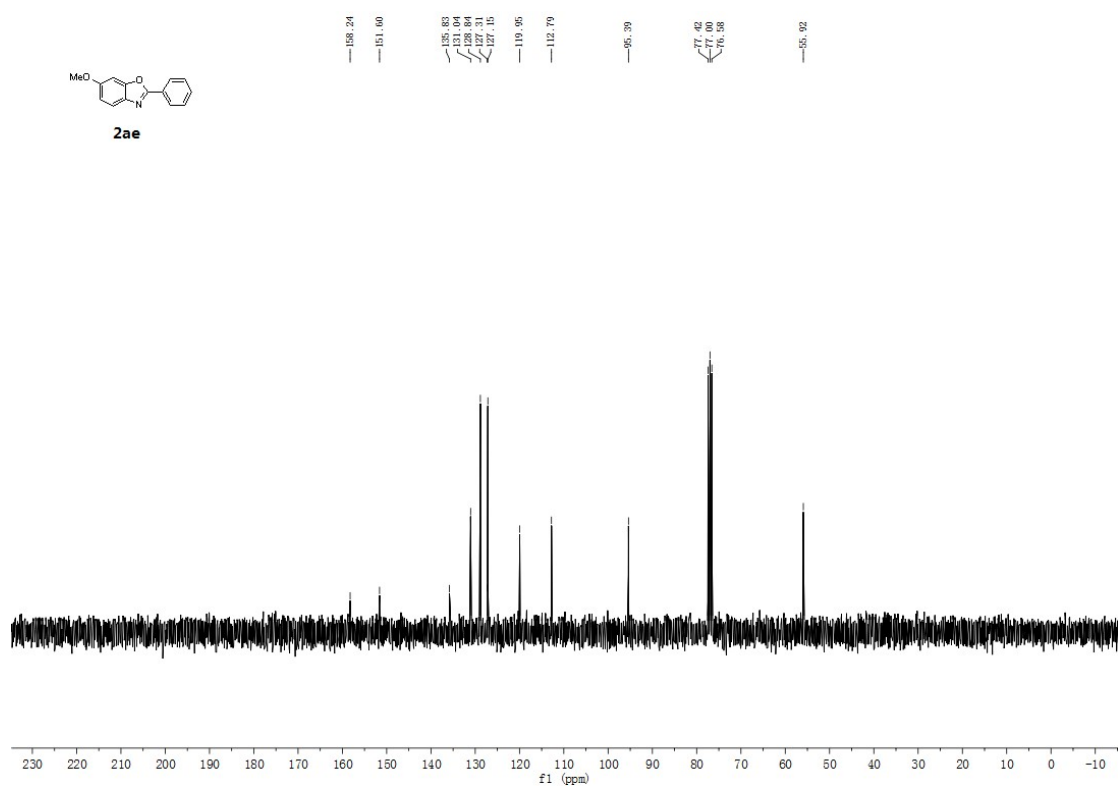

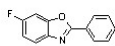

**2af**

8.14  
8.14  
8.13  
8.12  
8.11  
8.11  
7.63  
7.60  
7.58  
7.44  
7.43  
7.25  
7.22  
7.20  
7.17  
7.05  
7.02  
7.01  
4.99  
4.98

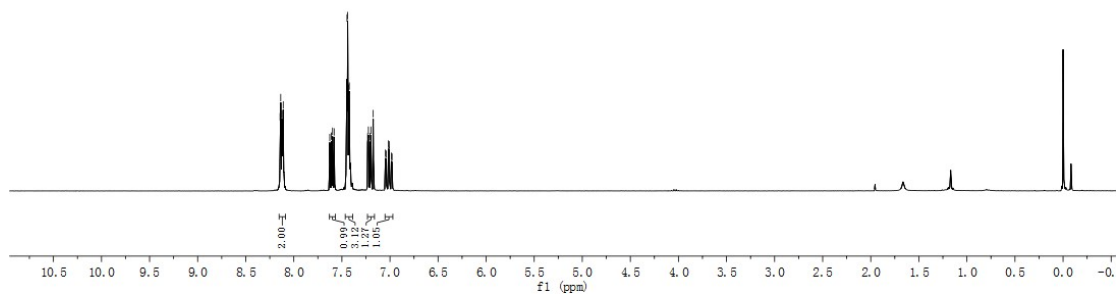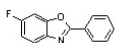

**2af**

162.27  
159.04  
150.79  
150.60  
138.42  
131.56  
128.92  
126.88  
120.29  
120.16  
112.67  
112.34  
98.82  
98.46  
77.42  
76.88

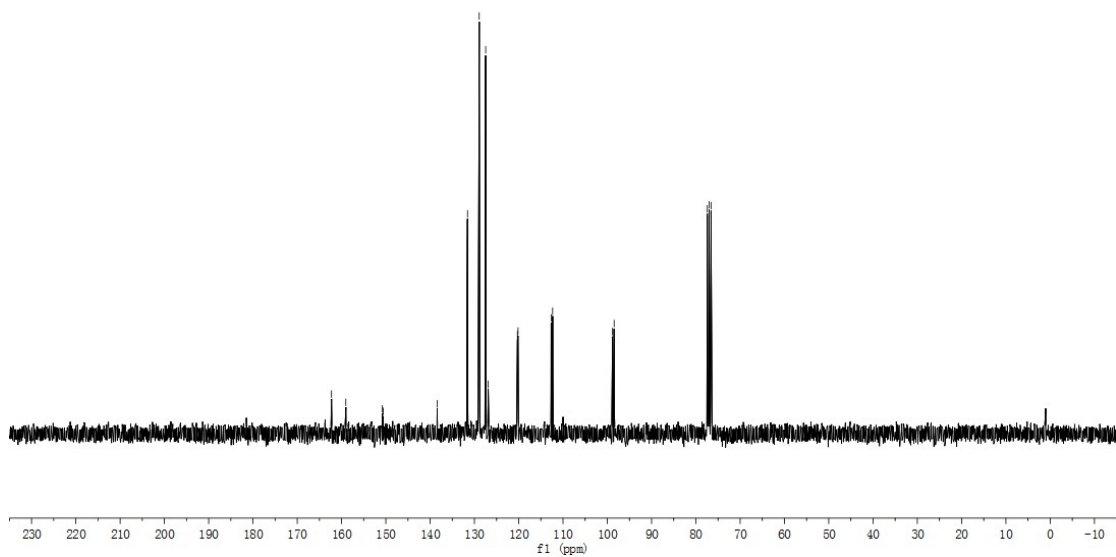

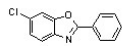

**2ag**

8.22  
8.21  
8.19  
8.19  
7.66  
7.56  
7.55  
7.52  
7.51  
7.49  
7.33  
7.33  
7.30  
7.29  
7.25

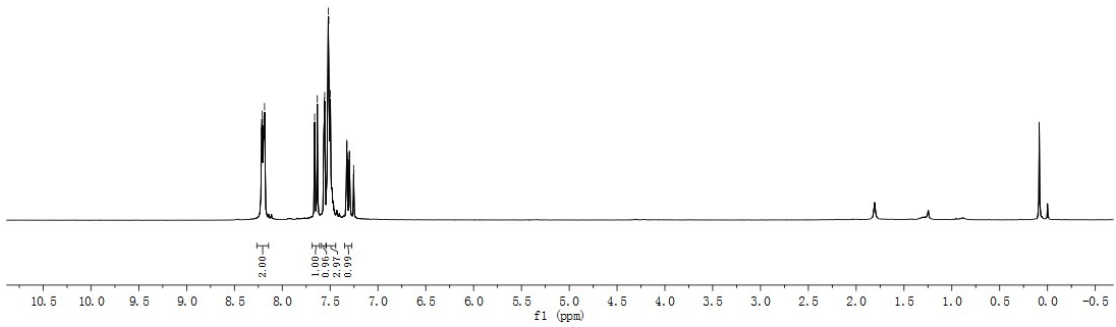

103.64  
150.87  
140.85  
131.74  
130.63  
128.91  
128.64  
125.23  
120.42  
111.18  
77.42  
76.88

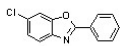

**2ag**

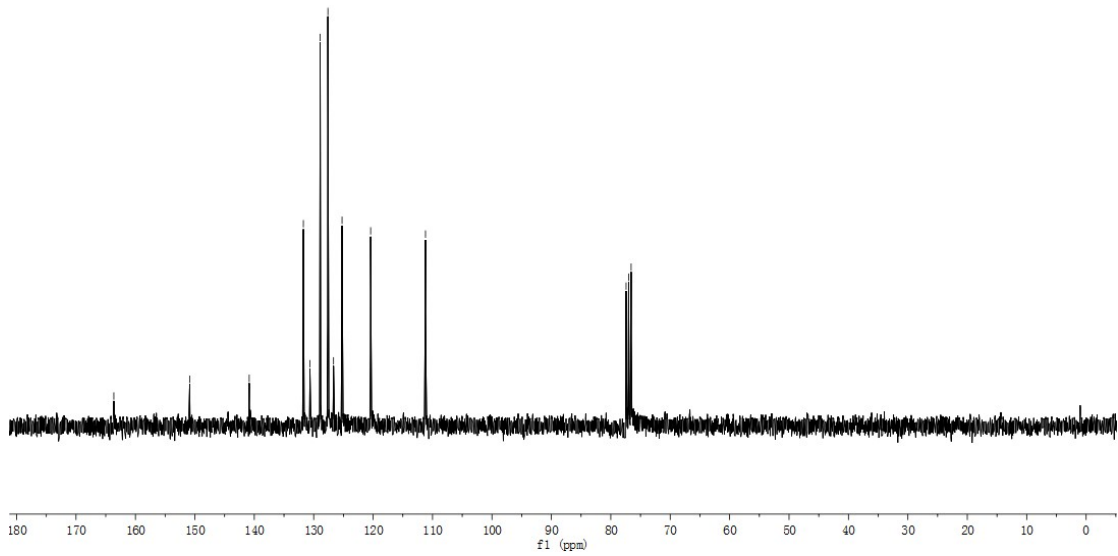



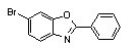

**2ah**

8.24  
8.23  
8.23  
8.23  
8.21  
7.74  
7.74  
7.53  
7.51  
7.50  
7.50  
7.50  
7.50  
7.49  
7.48  
7.46  
7.46

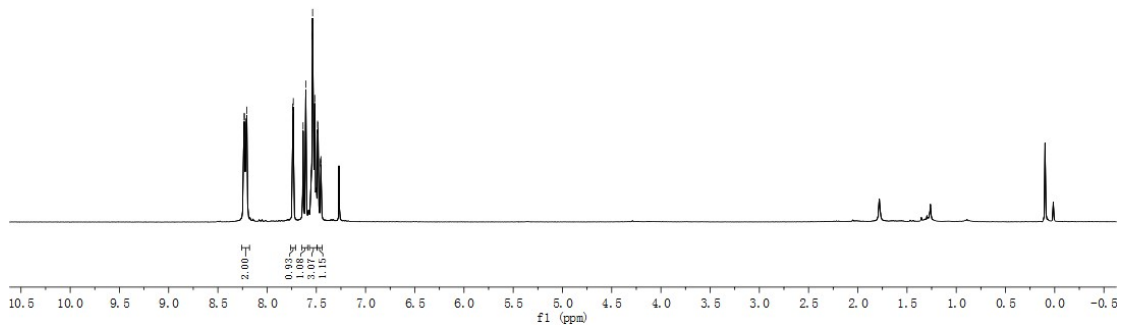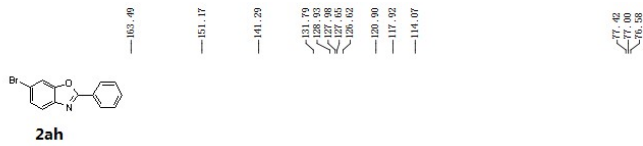

**2ah**

163.40  
151.17  
141.20  
131.79  
128.93  
127.65  
126.62  
126.90  
117.92  
114.07

77.42  
76.88

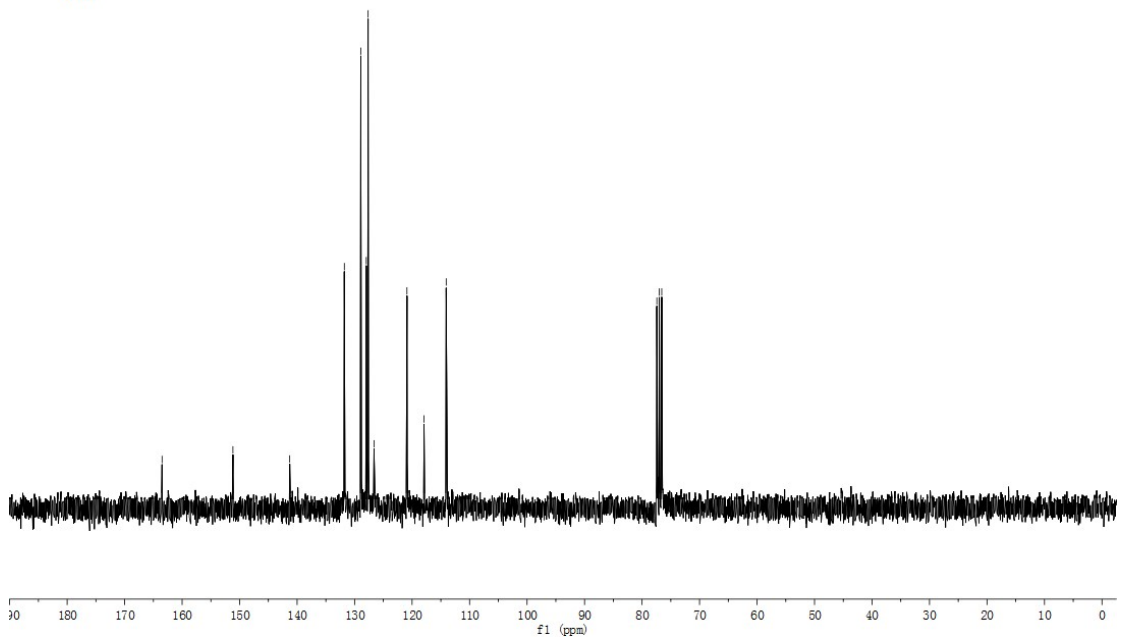

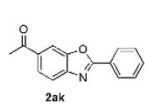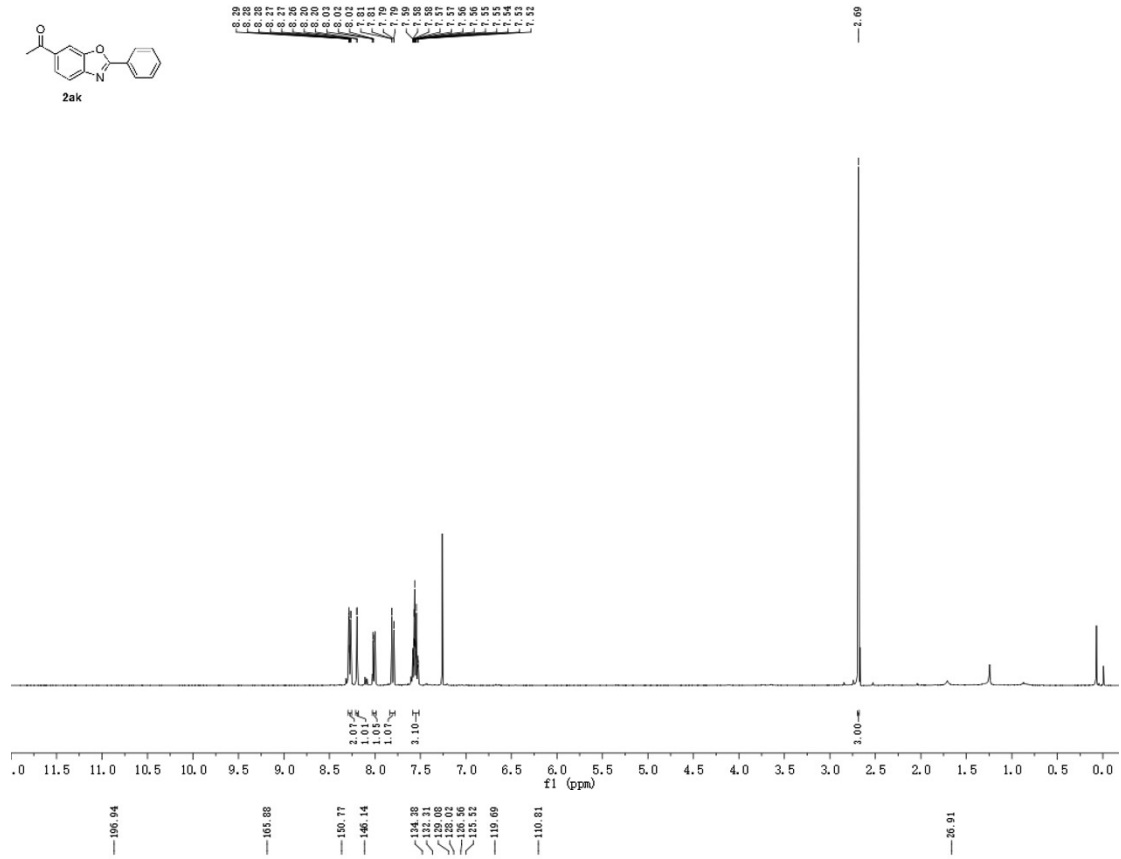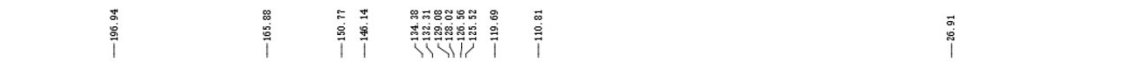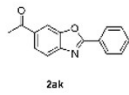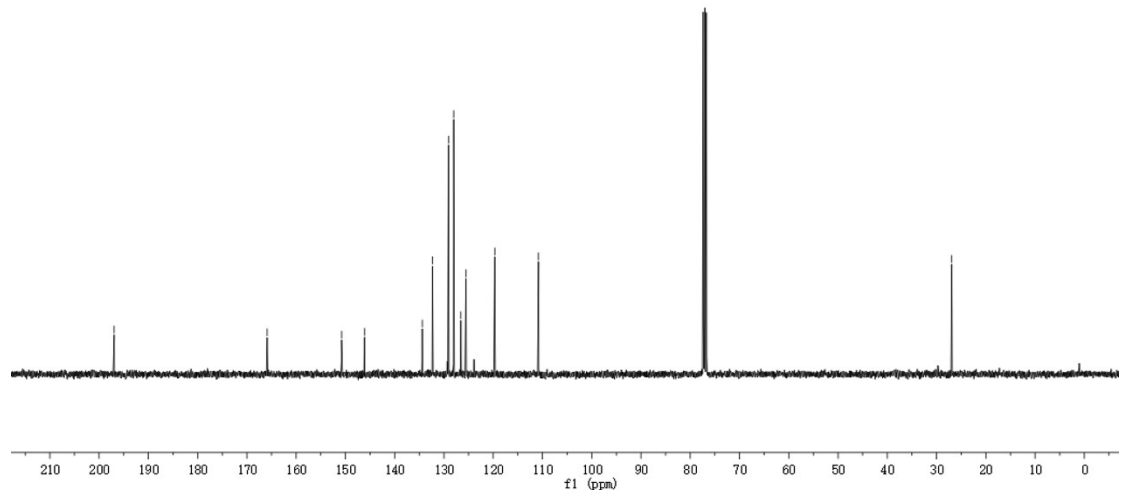

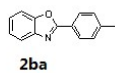

8.15  
 7.77  
 7.75  
 7.57  
 7.55  
 7.51  
 7.49  
 7.39  
 7.32  
 7.31  
 7.30

2.42

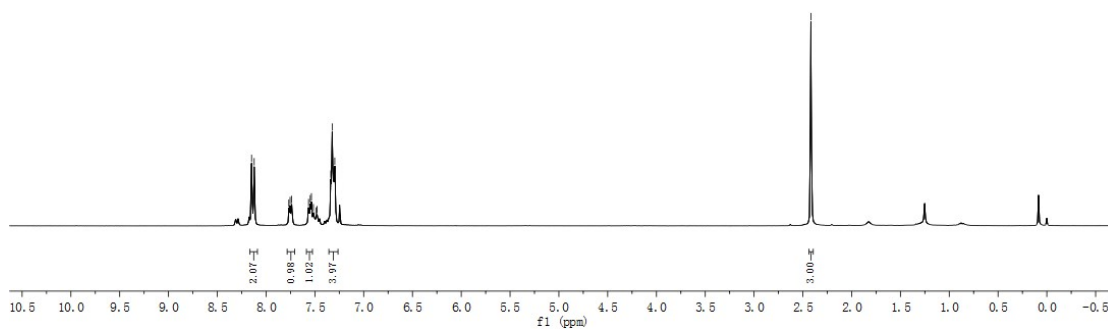

163.26

150.65

142.15

141.79

129.59

127.55

126.80

124.42

122.31

119.80

110.44

77.42

77.00

76.58

21.39

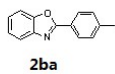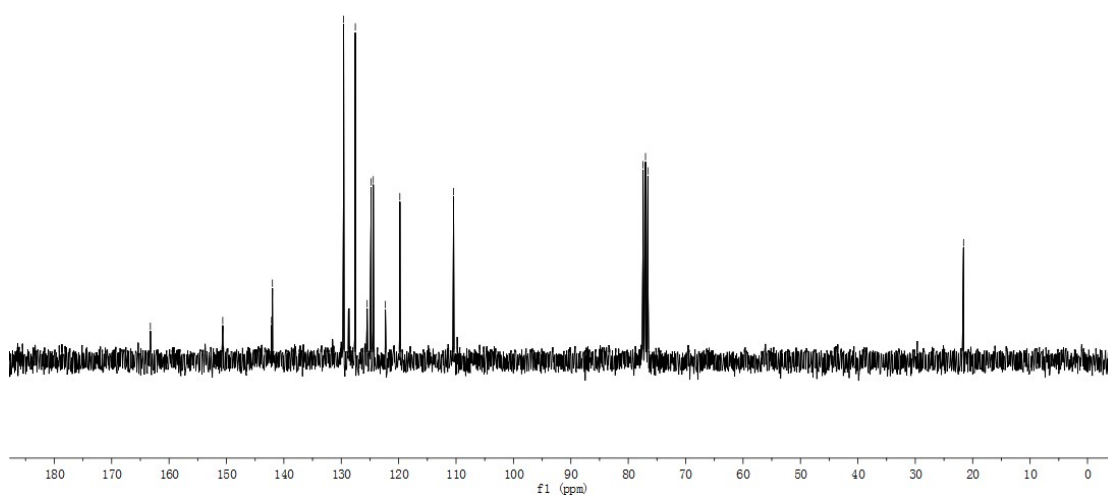

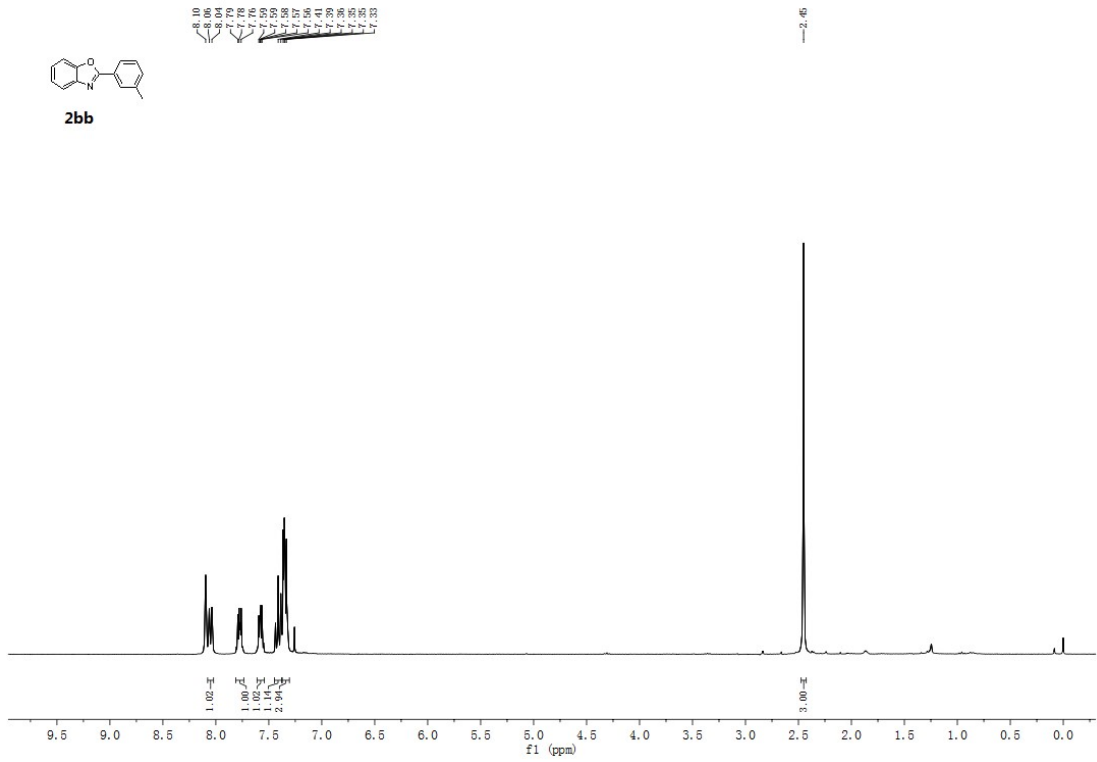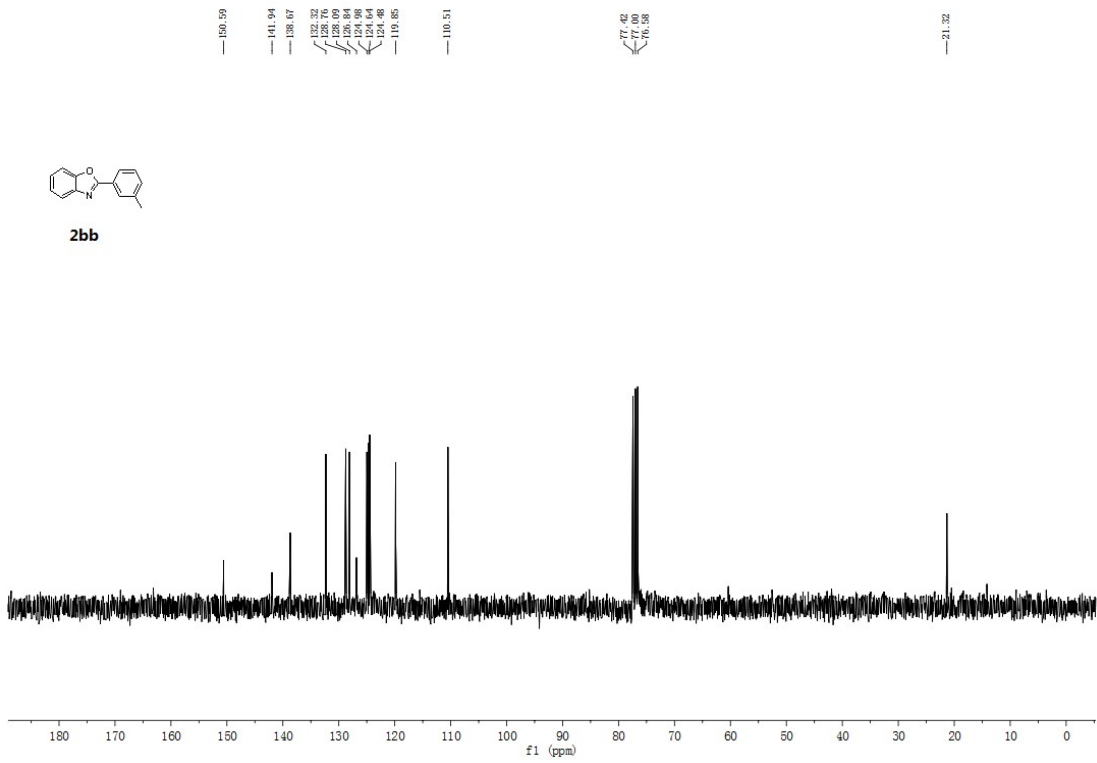

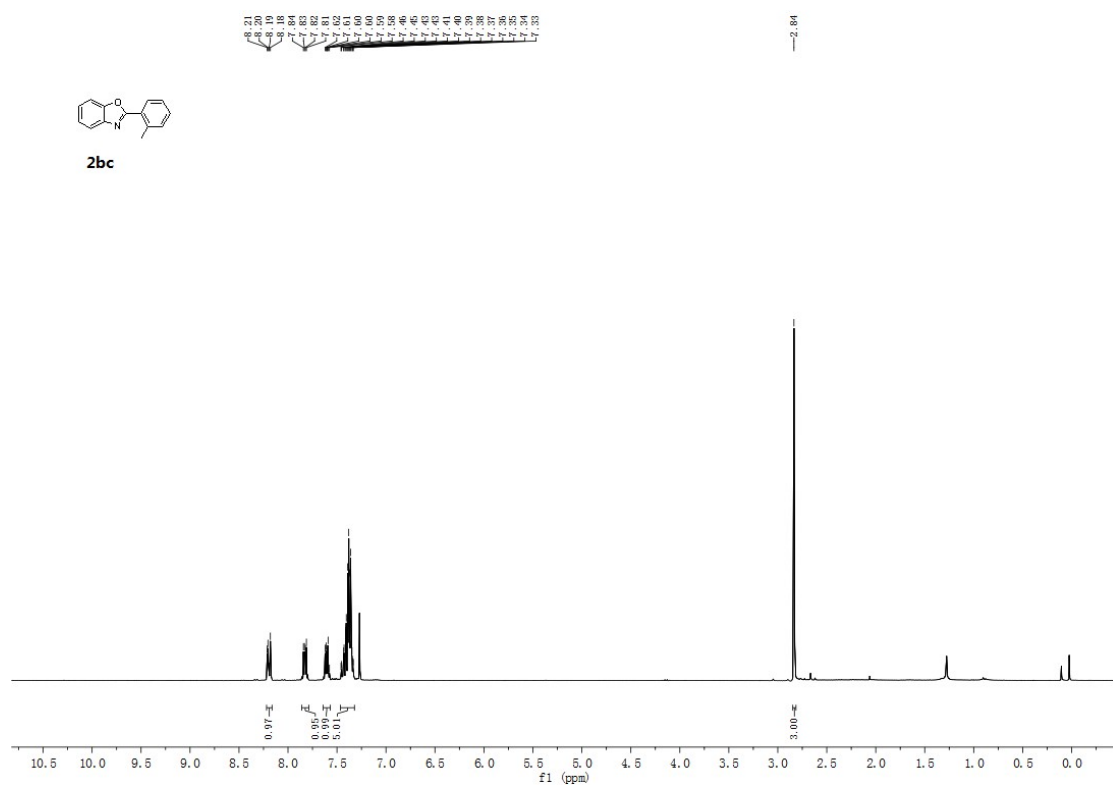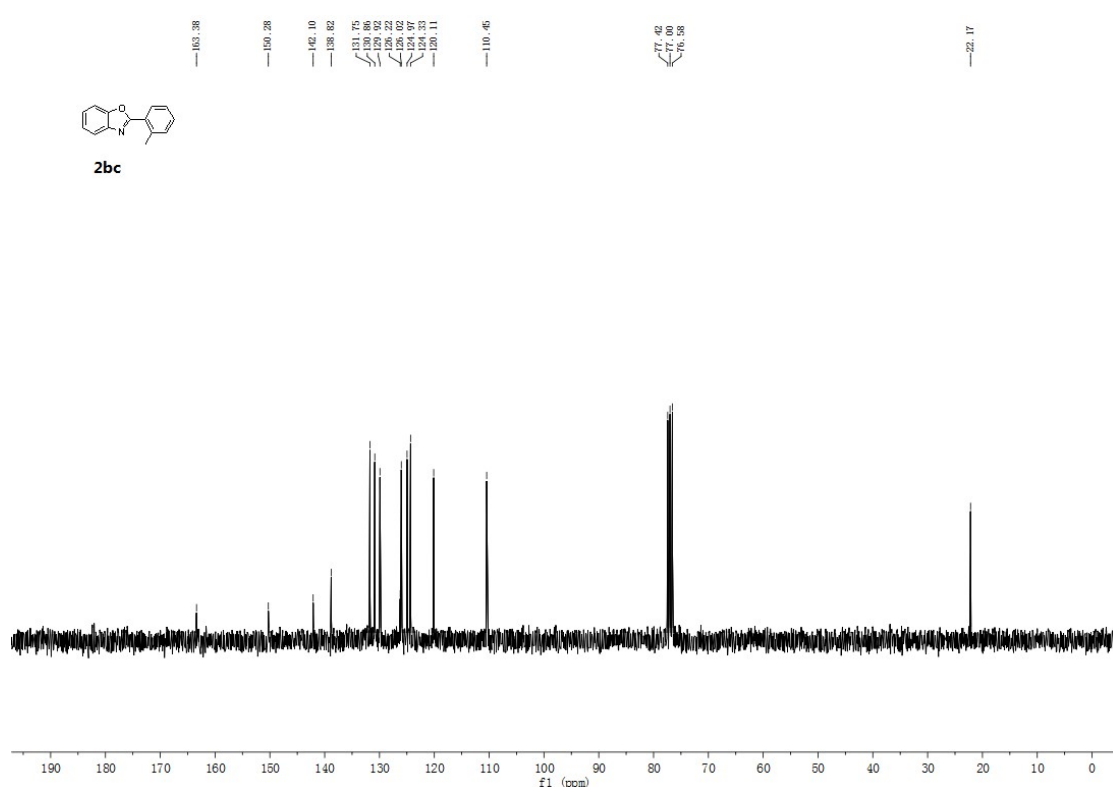

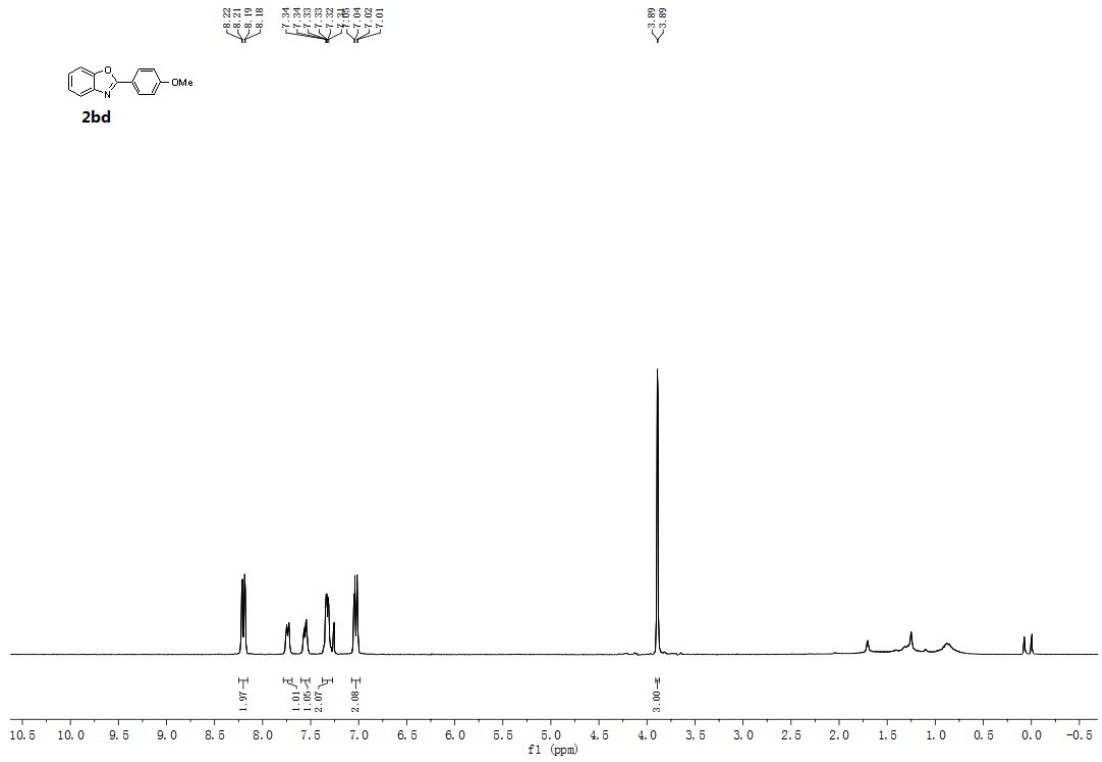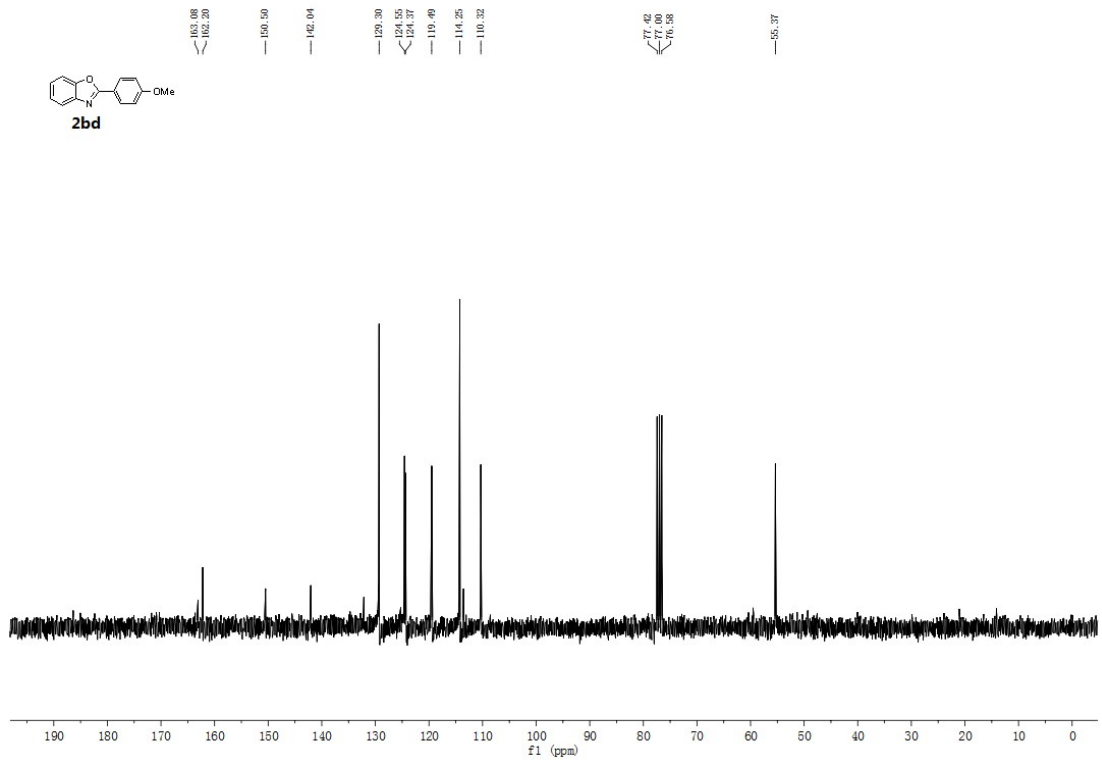



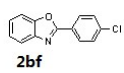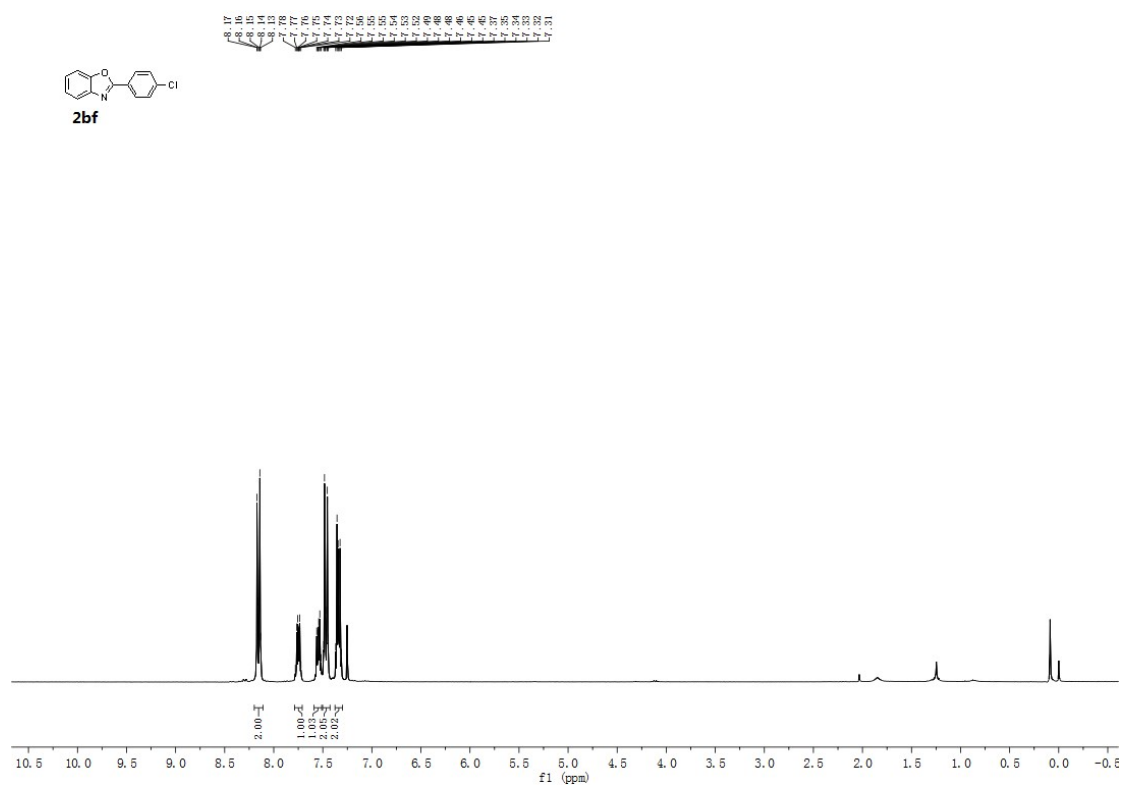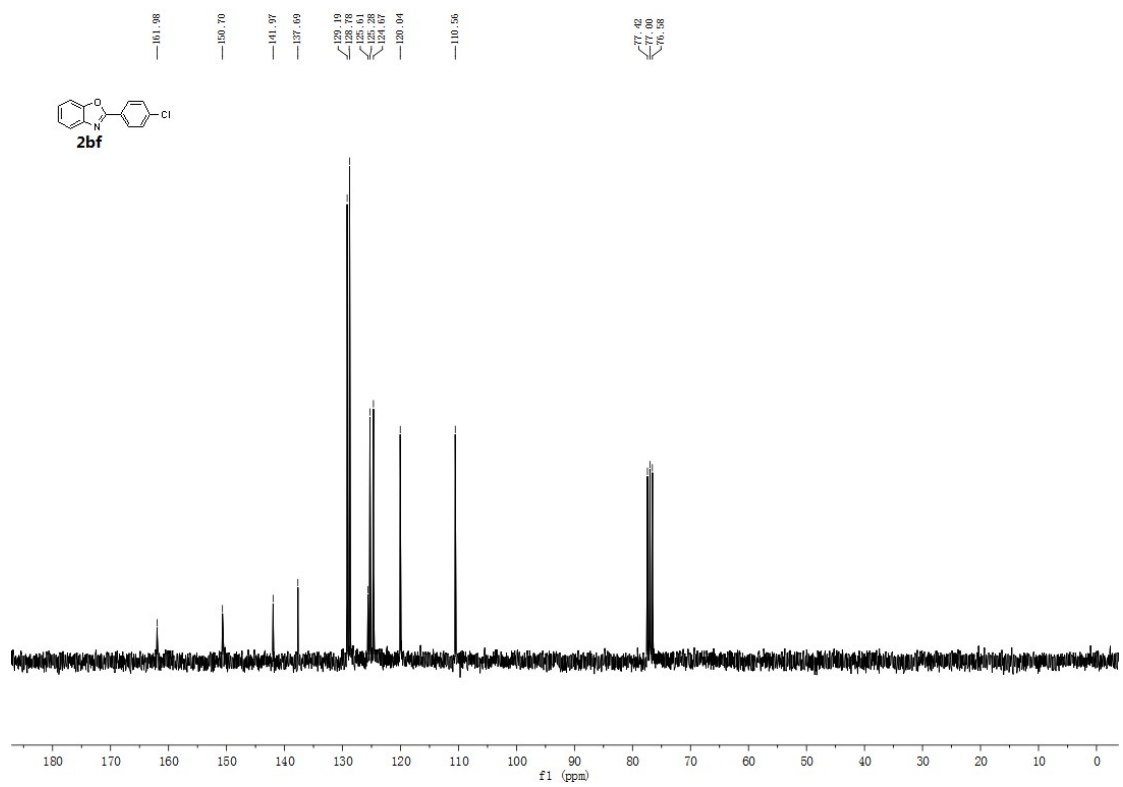



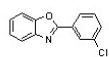

**2bg**

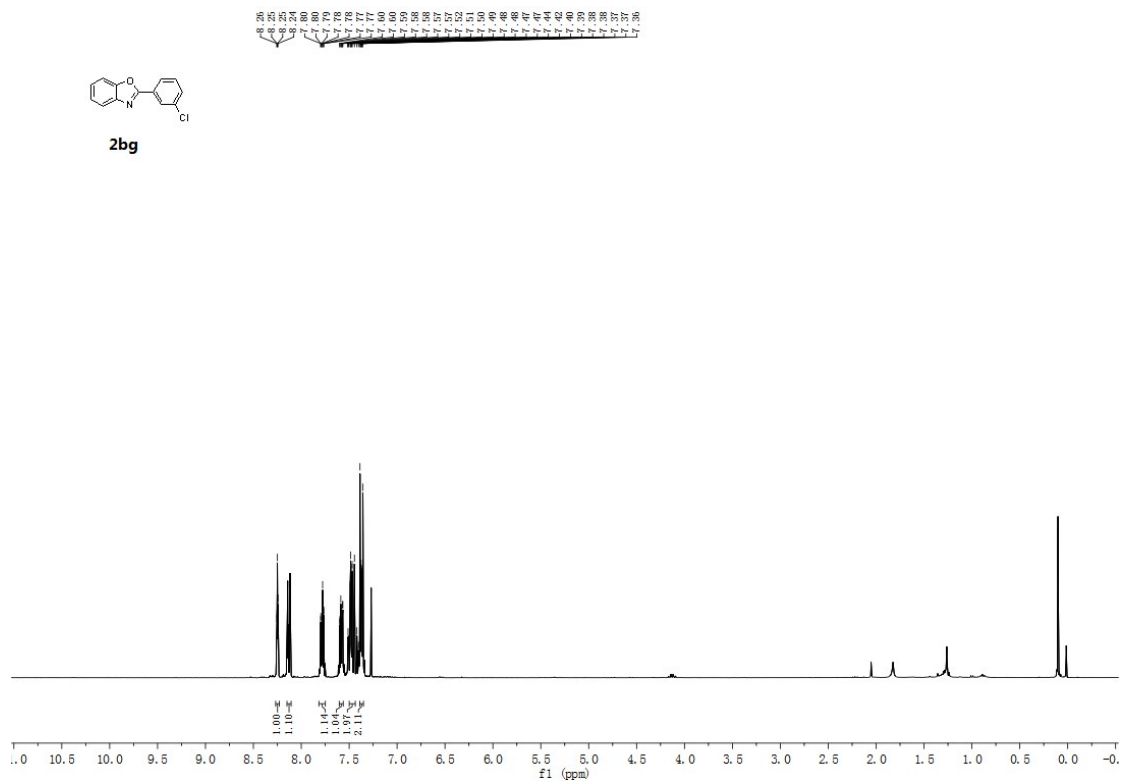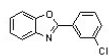

**2bg**

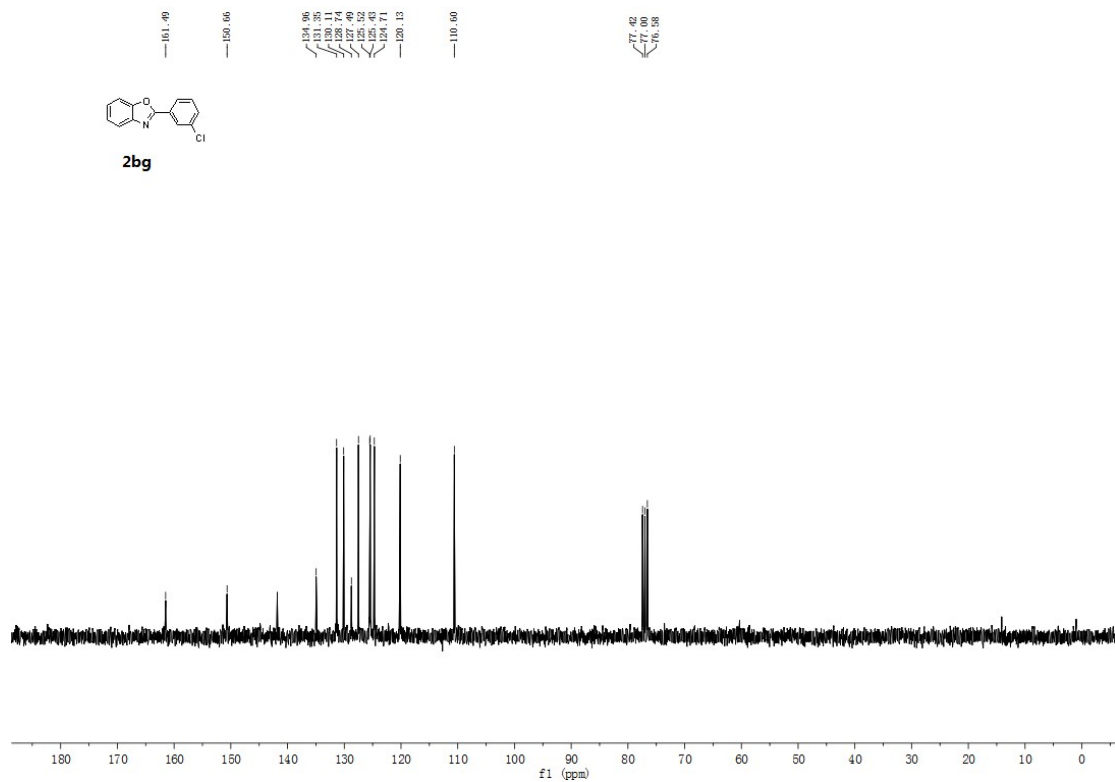

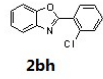

8.18  
8.17  
8.15  
8.15  
7.88  
7.87  
7.85  
7.85  
7.65  
7.65  
7.63  
7.62  
7.61  
7.60  
7.57  
7.57  
7.49  
7.48  
7.46  
7.46  
7.44  
7.43  
7.42  
7.41  
7.40  
7.39  
7.39

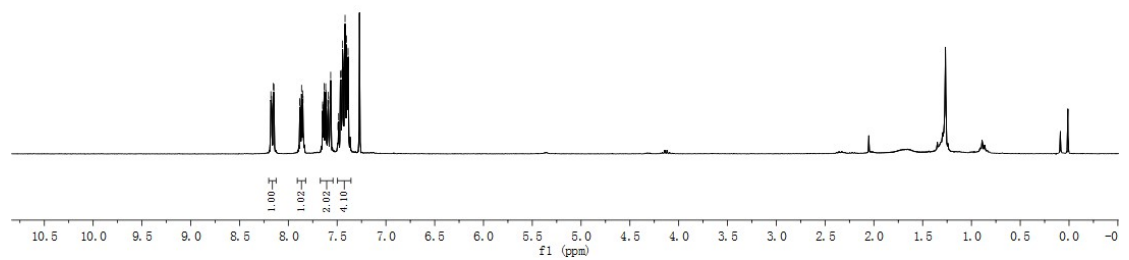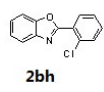

160.92  
150.55  
141.06  
133.46  
133.36  
131.79  
131.35  
128.89  
125.54  
125.48  
110.71  
77.42  
77.00  
76.58

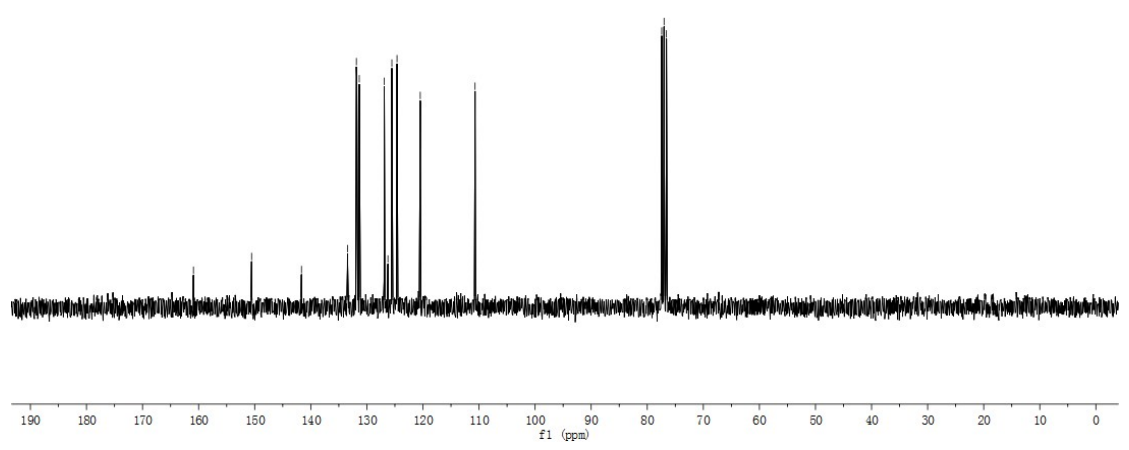

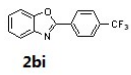

8.38  
 8.35  
 7.82  
 7.82  
 7.81  
 7.81  
 7.80  
 7.80  
 7.79  
 7.77  
 7.62  
 7.61  
 7.61  
 7.59  
 7.59  
 7.41  
 7.41  
 7.39  
 7.39  
 7.36

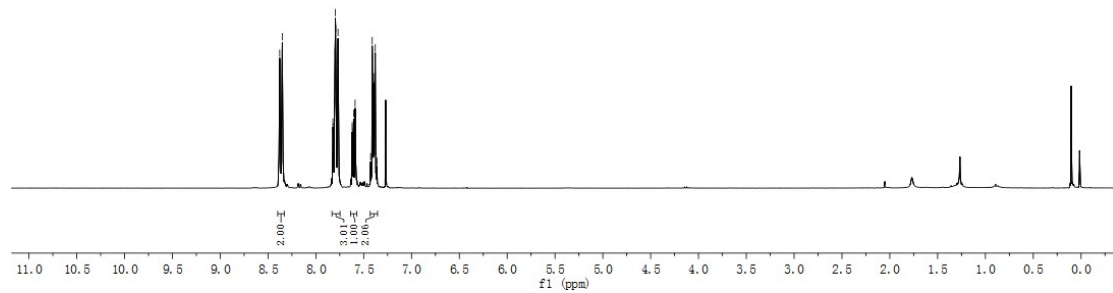

161.44  
 150.85  
 141.90  
 133.18  
 132.74  
 132.44  
 127.82  
 125.95  
 125.85  
 125.78  
 125.71  
 120.39  
 110.76  
 77.42  
 77.00  
 76.58

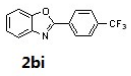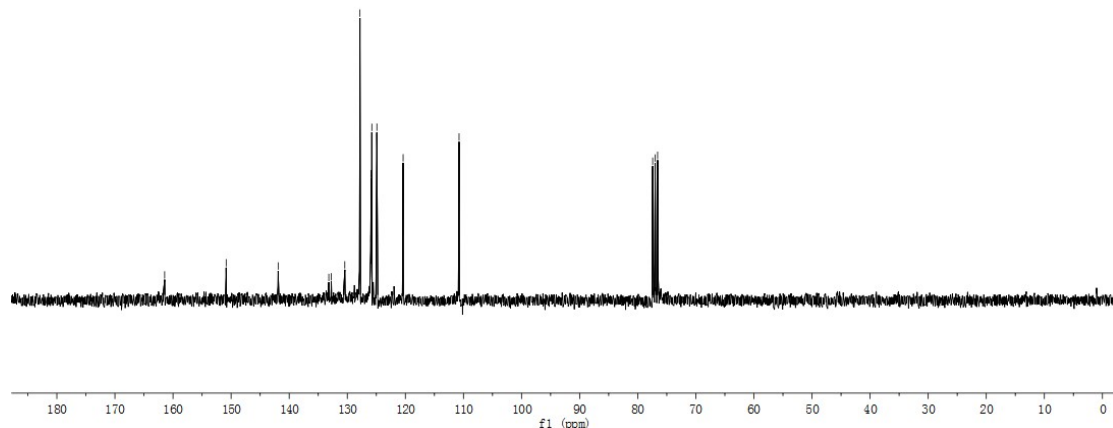



7.78  
7.76  
7.75  
7.74  
7.67  
7.66  
7.59  
7.57  
7.55  
7.53  
7.39  
7.37  
7.36  
7.35  
7.34  
7.29  
7.27  
7.27  
4.62  
4.61

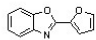

2bk

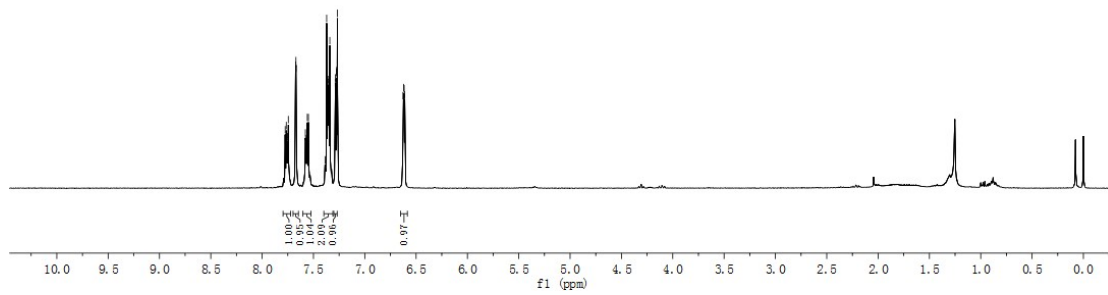

150.09  
146.82  
141.59  
125.23  
124.80  
120.09  
114.22  
112.21  
110.51  
77.42  
77.00  
76.58

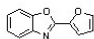

2bk

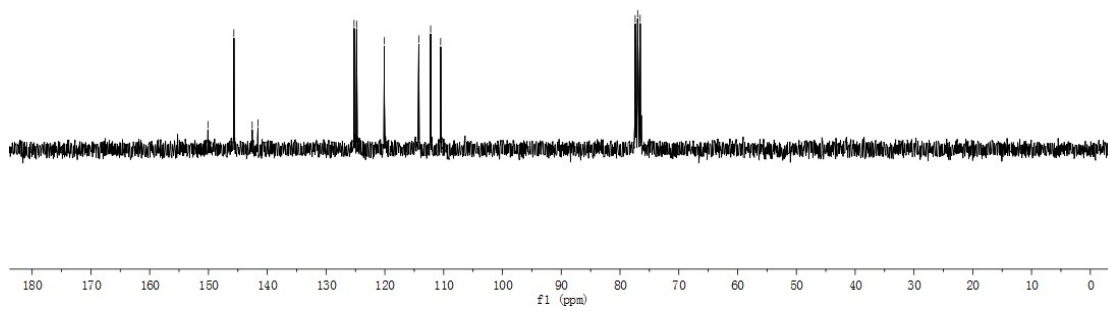

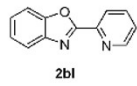

2bl

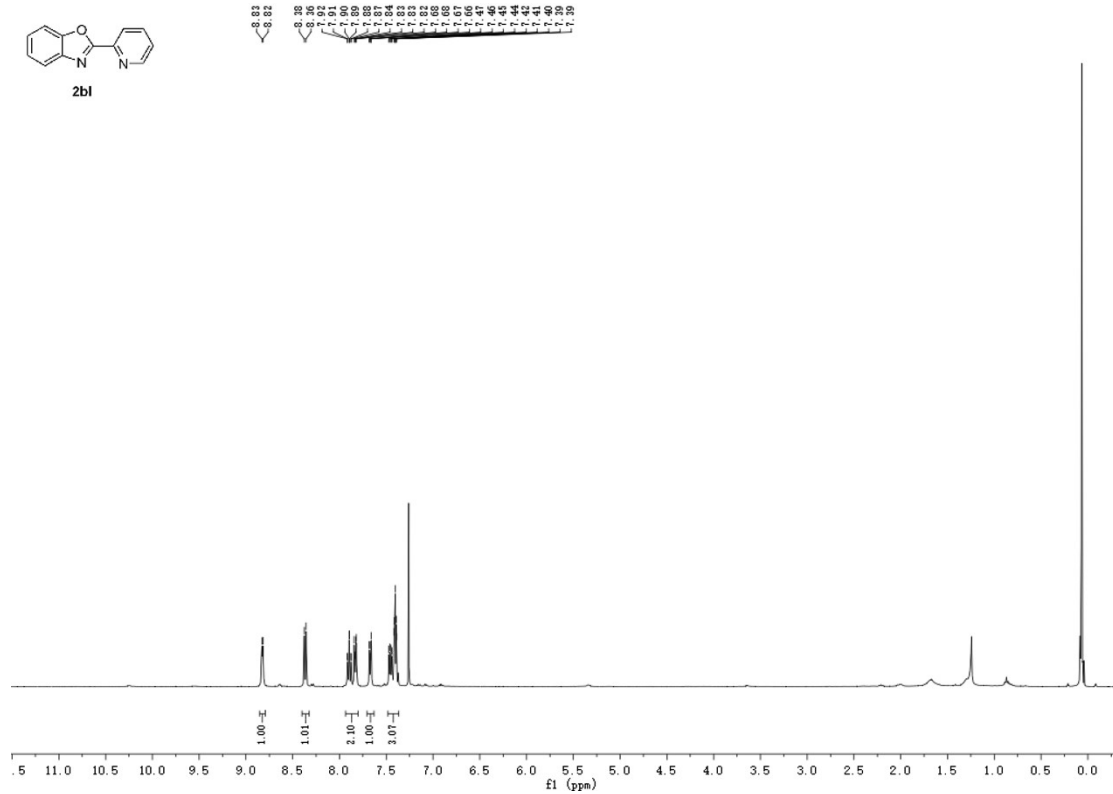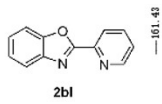

2bl

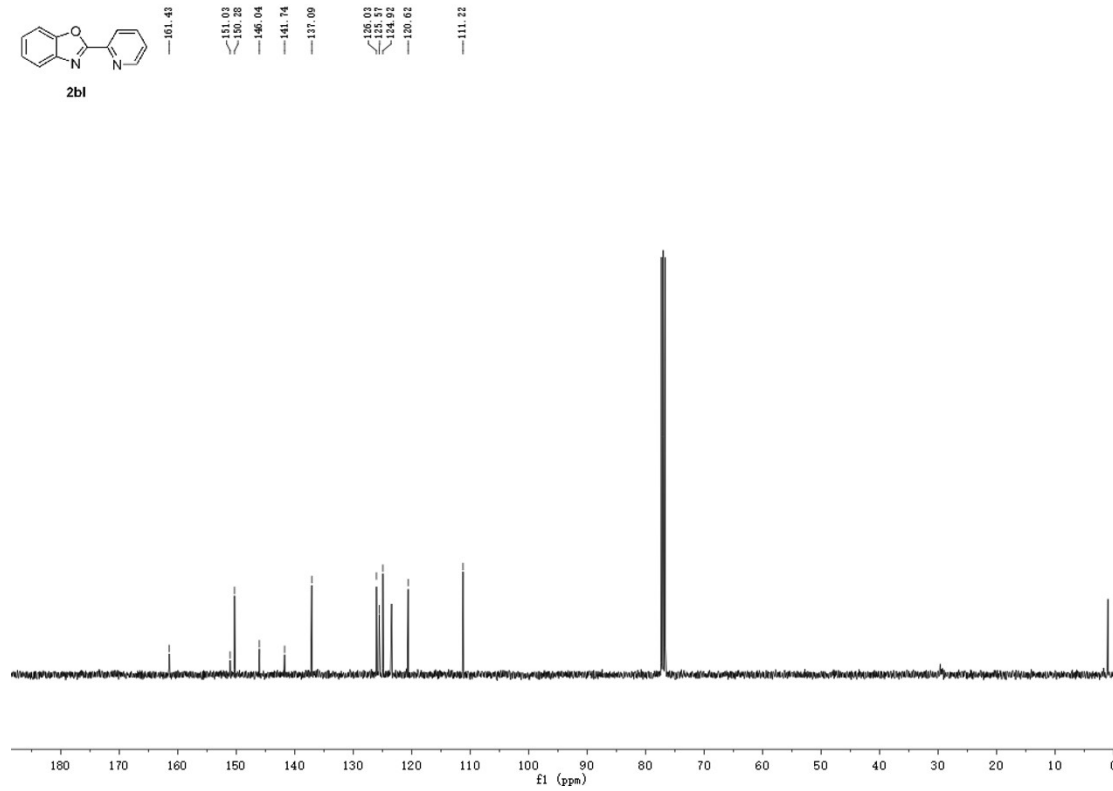

Supplement: d2qo00680d1.pdf [file d2qo00680d1.pdf]
